1  
2  
3  
4  
5  
6  
7  
8  
9  
10  
11  
12  
13  
14  
15  
16  
17  
18  
19  
20  
21  
22  
23  
24  
25  
26  
27  
28

Measurement of ocular transmission in living human eyes with a double-pass system

Roberto F. Sánchez<sup>1\*</sup>, Aníbal G. de Paul<sup>1</sup>, Francisco J. Burgos-Fernández<sup>2</sup>, Meritxell Vilaseca<sup>2</sup>, Jaume Pujol<sup>2</sup>, Luis A. Issolio<sup>1,3</sup>

<sup>1</sup> Instituto de Investigación en Luz, Ambiente y Visión (ILAV), San Miguel de Tucumán, Tucumán, Argentina

<sup>2</sup> Centre de Desenvolupament de Sensors, Instrumentació i Sistemes (CD6), Universitat Politècnica de Catalunya, Terrasa, Barcelona, España

<sup>3</sup> Departamento de Luminotecnia, Luz y Visión, Universidad Nacional de Tucumán, San Miguel de Tucumán, Tucumán, Argentina

\* Corresponding author

E-mail: [rsanchez@herrera.unt.edu.ar](mailto:rsanchez@herrera.unt.edu.ar) (RFS)

## 29 **Abstract**

30 Purpose: To develop a methodology based on a double-pass system to obtain useful information about the transmission  
31 of ocular media, performing noninvasive measures *in vivo*.

32 Methods: This noninvasive procedure consists of recording double-pass images at different voltages of a laser diode  
33 of 780 nm and the determination of the scattering in an area between 25 and 35 arc minutes of each image.

34 Results: Ocular scattering showed a linear behavior respect to the voltage of the laser and the slope of the linear fit was  
35 proportional to the transmittance squared of the media evaluated. The relationship between the ocular light scattering  
36 of the images and the transmittance values of several filters located into an artificial eye was used as a calibration  
37 function. The measurements performed in a group of ten subjects with ages between 25 and 45 years old presented a  
38 mean direct transmittance of the whole eye including retina of 42.7 %, which agrees with the bibliography. No  
39 differences between dark eyes and light eyes were found.

40 Conclusion: We have developed a method to determine the transmittance of the human eye *in vivo* for a wavelength  
41 of 780 nm using the double-pass method, commonly used for the determination of the optical quality of an eye.

42

## 43 **Introduction**

44 Knowledge of transmission of the eye can be useful both for clinical applications where it is important to  
45 estimate the amount of light actually reaching the photoreceptors and in the field of illumination where it is often  
46 necessary to characterize visual stimuli not only with luminance, which represents the light arriving the eyes but also  
47 with retinal illuminance, which includes in its rigorous definition the transmittance of the eye [1].

48 Boettner and Wolter, as well as Geeraets and Berry, have measured the direct and total transmittance of  
49 isolated components of the ocular media, including the cornea, aqueous, lens and vitreous, but without including retina;  
50 using enucleated eyes of human donors and rhesus monkey [2-4]. They considered a wide range of wavelengths  
51 including visible, near ultraviolet (UV) and near infrared. Those results were confirmed by Alpern et al. with *in vivo*  
52 measurements performed on subjects with structural abnormalities in the fundus of the eye (chorioretinal coloboma).  
53 That condition allowed the determination of the amount of light transmitted by the eye, through a direct comparison  
54 of the component reflected in the sclera of a light beam with a reference [5]. Dillon et al. proposed an invasive method  
55 for measuring the absorption spectrum of the anterior segment of the intact eye. The true spectrum of light that is

56 transmitted to the retina was calculated for four different species that are commonly used in animal model experiments  
57 [6]. Van Norren and Vos have estimated the spectral transmittance of the eye as the measured difference in the scotopic  
58 visual sensitivity of two wavelengths with the same rhodopsin absorbance [7]. Many other studies of the human ocular  
59 media were limited to a single component of the eye, usually cornea or lens. In 2007, van de Kraats and van Norren  
60 proposed empirical equations to estimate changes in ocular transmittance as a function of eye age [8]. Based on existing  
61 data and these equations, the International Commission on Illumination (CIE) established the transmission of the  
62 standard observer for UV, visible and infrared which can be used as a reference [9]. Currently, there is no simple  
63 procedure for measuring the transmittance of the whole eye of a healthy subject.

64 The purpose of this work is to take advantage of the double-pass technique to estimate in a direct way the  
65 transmittance of the eye at a given wavelength. The double-pass method is a simple, fast, safe, and non-invasive  
66 technique to obtain information about the energy that enters the eye, crosses the ocular media, reflects in the fundus  
67 and returns. This technique is based on imaging a point source on the retina, and then recording the reflected light  
68 through a CCD camera [10]. The acquired image is the autocorrelation of the point spread function (PSF) of the eye  
69 [11], which describes how the optical system behaves against a point light source [12].

70 It is known that in the retina, light is reflected by different layers and a significant portion of the light reflected  
71 by the background comes from the choroid and is dependent on pigmentation and wavelength [13,14]. In a double-  
72 pass system, the imaging formation approximates that of a confocal system, so that most of the light coming from the  
73 deeper layers not conjugated to the camera are spreading, adding a background signal to the recorded image. Thus, the  
74 double-pass image shows a very narrow peak mounted on a fairly wide tail [15]. Scattering affects both the peak and  
75 the wide-angle part of the PSF, unlike aberrations, which are limited to the very narrow-angle part of the PSF [16-18].  
76 Several authors showed that it is possible to obtain information about intraocular scattering by analyzing the peripheral  
77 zone of the double-pass image up to 20 arcminutes [19-21].

78 Our goal is to develop a methodology based on a double-pass system to measure the transmission of ocular  
79 media, performing noninvasive measures *in vivo*. In this work, we propose a simple method to determine the direct  
80 transmittance of the eye including the retina, based on the acquisition and analysis of double-pass images.

81

## 82 **Material and Methods**

## 83 **Experimental setup**

84 A scheme of the optical system mounted is shown in Fig 1. A point source (O) from a 780 nm laser diode  
85 (MC7850CPWR-SMF) coupled by single-mode optical fiber to a collimator lens L1 ( $f = 15$  mm) is projected onto the  
86 retina (O'). After reflecting on the retina and a double pass through the ocular media, a CCD camera records the double-  
87 pass image (O''). The diaphragm PE ( $\varnothing = 2$  mm) is conjugated to the pupil plane of the eye and acts as the effective  
88 input pupil of the system. After being reflected by beam splitter BS1 and mirror M1, the beam passes through the  
89 Badal system formed by the lenses L2-L3 ( $f = 200$  mm) and by the mirrors M2-M3 that regulate beam vergence,  
90 allowing correction of refractive errors such as myopia or hyperopia of the eye before performing the measurement.  
91 After reflection in mirror M4, the eye forms the image of the point source on the retina. A second diaphragm PS ( $\varnothing =$   
92 4 mm), located after the beam splitter (BS2), is also conjugated to the pupil of the eye and acts as the effective exit  
93 pupil (provided the natural pupil of the eye is greater than PS). Then a lens L4 ( $f = 100$  mm) forms the double-pass  
94 retinal image in a CCD camera (UI-2220ME-M, 8 bits, 768x576 pixels) integrating light from the retina during the set  
95 exposure time. The subject's head is placed in a chin rest which allows the correct centering and control of natural  
96 pupil with respect to the artificial one. A camera CMOS (UI-1221LE-M-GL) and the lens L5 ( $f = 50$  mm) are mounted  
97 to ease this process. The fixation of the eye is facilitated using a fixation target (FT) located at the optical infinity by  
98 the lens L6 ( $f = 35$  mm).

99

100 **Fig 1. Schematic representation of the double-pass setup mounted for this work.** See text for further details.

101

102 To eliminate back reflections from lenses L2 and L3, these elements were tilted slightly, so that the specular  
103 reflection at the interfaces of these lenses was deflected off the field picked up by the CCD sensor. The corneal reflex  
104 and the lens reflex (Purkinje images) are not observed in the double-pass image captured, due to a small decentering  
105 of the measuring beam with respect to the pupil of the subject. Other diffuse reflections are reduced by light traps (not  
106 shown in Fig 1). Finally, there are still spurious reflexes that are integrated by the sensor during the recording of the  
107 images. However, these are considered during postprocessing by subtracting the captured background when removing  
108 the eye.

## 109 **Methodological proposal**

110 The proposed procedure to determine the transmission of the ocular media consists of recording a series of  
111 double-pass images, each taken at a different intensity of the laser diode, which was controlled by a supply voltage  
112 from 0 mV to 4000 mV. The intensity in each record was increased from low values, where the maximum of the image  
113 did not saturate, until values high enough to obtain images with the greater gray level possible in the more peripheral  
114 pixels. In the capture performed at each intensity an image of the background was also obtained, which was then  
115 subtracted from the corresponding double-pass image. The centroid of each image was calculated and, taking this  
116 position as a center, the radial profile was obtained (averaged of pixels at different radii); from which the gray levels  
117 of an area between 25 and 35 arc minutes were averaged. This average, which we will call hereafter double-pass  
118 scattering (DPS), was determined for each image taken with different levels of the voltage of the laser (LV).

119 If the low order aberrations are corrected during the acquisition, then the central part of the double-pass PSF  
120 is affected by higher order aberrations and light scatter. However, the area of the PSF analyzed in our work is only  
121 affected by light diffused in the fundus and light scattered in the ocular media.

122 In Fig 2, DPS values are plotted as a function of LV and a linear relationship between them is observed. A  
123 straight line can be fitted to the data using least squares.

124  
125 **Fig 2. A typical curve of double-pass scattering (DPS) as a function of the laser voltage.** DPS was computed as a  
126 mean of the grey levels in a ring of 25 to 35 arc minute of the double-pass image.

127  
128 Our hypothesis was that the scattering increases proportionally with the intensity of the laser diode, not  
129 affecting the slope. Moreover, as the light has to cross the ocular media twice, we expect the slope to be proportional  
130 to the transmission squared of the eye.

## 131 **Measurements in an artificial eye with filters**

132 To test the proposed methodology, measurements were made with an artificial eye built in the laboratory  
133 consisting of two lenses simulating the cornea ( $f = 25$  mm) and the lens ( $f = 50$  mm), plus a black diffuser screen  
134 located in the focal plane of the lens system acting as a reflective retina. In order to simulate eyes with several  
135 transmissions, neutral filters of different optical density (0.1, 0.3, and 0.5) were placed in front of the artificial eye.  
136 Additionally, measurements with photography effect filters (BPM1, BPM2, and C3020) that have been shown to be  
137 very suitable to simulate the same type of scattering produced by a cataract eye were performed [22,23].

138 Previously, these filters were characterized by their direct transmittance and those with transmission values  
139 that allowed to achieve laser energy levels comparable to those used in double-pass measurements in real eyes were  
140 selected. The transmittance measurement was performed using the 780 nm laser as an illuminator and a sensor (E2V,  
141 Spindler & Hoyer) to record the amount of luminous flux emitted by the source as well as the amount of light passing  
142 through each filter. We placed the detector further from the filter and used an aperture before the detector which  
143 subtended an angle at the filter of  $1^\circ$ . Thus, the sensor detected only that part of the transmitted radiation which exited  
144 the filter within a one-degree angle collinear with the incident radiation. From this data, we computed the direct  
145 transmittance of the filter. This component is also called the focusable transmittance and is important for understanding  
146 the deposition of laser energy on the retina.

147 Measured transmittances at 780 nm in each of the filters used to obtain the calibration curve with the artificial  
148 eye are shown in Table 1.

149

150 **Table 1. Direct Transmission Measurements**

| Filter  | Measured Transmission |
|---------|-----------------------|
| ND 0.01 | 97 %                  |
| ND 0.1  | 88 %                  |
| ND 0.3  | 56 %                  |
| ND 0.5  | 34 %                  |
| BPM1    | 68 %                  |
| BPM2    | 59 %                  |
| C3020   | 85 %                  |

151

152 In Fig 3 are presented the profiles of a set of double-pass images taken in the artificial eye without any filter.  
153 As the voltage of the laser increases, the central area of the curve saturates and a measurable variation in the peripheral  
154 zone (the skirt of the curve) can be observed.

155

156 **Fig 3. Double-pass image profiles obtained in the artificial eye without any filter.** The curves correspond to four  
157 different voltage applied to the laser diode (620, 1110, 1620, and 2130 mV).

158

159 In Fig 4 are plotted the DPS values as a function of laser voltage for each of the considered filters, as well as  
160 for the artificial eye without a filter. Straight lines were fitted for each condition and the slopes were obtained. As the  
161 transmission of the filters increases, the slopes are ordered from lowest to highest, which leads us to call them ocular

162 transmission index (OTI). Plotting the relationship between OTI and the direct transmittance measured at each filter,  
163 a quadratic curve (Fig 5) was obtained and then used to determine the transmission of the ocular media in subjects.

164

165 **Fig 4. DPS as a function of laser voltage obtained in the artificial eye with and without filters.** Three photography  
166 filters (BPM1, BPM2, and C3020) and three neutral density filters (ND 0.1, ND 0.2, and ND 0.3) were used along  
167 with the artificial eye. The straight lines correspond to the linear fit performed.

168 **Fig 5. Ocular transmission index (OTI) as a function of the transmittance measured in the filters.** OTI values are  
169 the slopes of the straight lines in Fig 4.

170

171 From the curve fitted to the data plotted in Fig 5 can be deduced the following expression to estimate the  
172 direct transmission of ocular media ( $T$ ) as a function of the OTI:

173 
$$T = \left( \frac{OTI}{0.00932} \right)^{1/2} . \quad (1)$$

174

## 175 **Reflectance analysis**

176 The energy captured in the double-pass image could also depend on the fundus reflectance of the human eye  
177 or the reflective surface of the artificial eye. To analyze the effect of this factor on the measurement, double-pass  
178 images of the artificial eye with different reflective surfaces (white paper and black paper) were taken. The results  
179 presented in Fig 6 (a) show that although very different profiles of double-pass images are obtained in each condition,  
180 there are no significant changes in the peripheral zone of the curves (note that the vertical axis is in logarithmic scale),  
181 which can also be seen in Fig 6 (b) where the fitted curves do not change when the reflectance in the artificial eye is  
182 modified (independent sample t-test was used for comparing means in each condition, P-value > 0.05 in all cases).

183

184 **Fig 6. Analysis of the effect of reflectance on the measurement of OTI.** (a) Double-pass image profile obtained for  
185 two different papers used as artificial retinas (black and white) measured at the same laser voltage. (b) Curves fitted to  
186 the OTI data vs. transmittance for two papers used. Conditions measured are the three neutral filters (ND 0.1, ND 0.3,  
187 and ND 0.5) and the artificial eye without a filter. The solid line corresponds to black paper and dashed line to white  
188 paper.

189  
190 In order to analyze the OTI independence regarding the variation of the reflectance between different retinas,  
191 five subjects were evaluated. The set of curves were obtained considering the same intensity of the laser provided by  
192 a voltage of 1400 mV.

193 Fig 7 shows the double-pass image profiles determined in this group of subjects. Values in the zone between  
194 25 and 35 minutes of arc vary around a gray level of  $1.0 \pm 0.3$  for all the subjects, which verifies the hypothesis about  
195 the independence of the OTI respect to the reflectance of the retina.

196

197 **Fig 7. Double-pass images profiles determined in five subjects with the same laser voltage.**

198

## 199 **Measurements in volunteers**

200 Once the method was tested on the artificial eye with different filters and the calibration curve was determined  
201 (Fig 5), double-pass images were recorded in eyes of ten volunteers aged 25-45 years (Group A). Seven of the subjects  
202 were classified as dark-eyed (four dark brown and three light brown) and three as light-eyed (blue), according to a  
203 classification by simple iris observation [24]. Depending on the characteristics of the eye, intensities between 1000  
204 and 4000 mV were used and at least five DPS were measured in each subject to ensure a good fit. In each case, the  
205 dominant eye was chosen to perform the measurement.

206 Additional measurements were made in another group of five volunteers (Group B) to evaluate the range of  
207 low transmittance values. For this set of measurements, neutral density filters (0.01, 0.1, and 0.3) were placed in front  
208 of the eye of each subject and then the OTI slope was obtained for each condition. For all measurements, the exposure  
209 levels were never greater than the maximum permissible exposure ( $14.45 \text{ W/m}^2$ ) which was established by the current  
210 standard regulating the use of laser radiation in living tissue [25].

## 211 **Ethical considerations**

212 Ethical approval for this study was obtained from the Comité de Ética en Investigación (CEI) of the  
213 Universidad Nacional de Tucumán and Consejo Nacional de Investigaciones Científicas y Técnicas (RESOLUCION  
214 N° 26/2018). All the subjects were informed about the object of the study, and a written informed consent was obtained,  
215 following the tenets of the Declaration of Helsinki.



216

## 217 Results

218 In Fig 8 are presented DPS data as a function of laser voltage for Group A, and the straight lines fitted in all  
219 the subjects. All the data show a good linear fit, with an  $R^2$  always greater than 0.85.

220

221 **Fig 8. Double-pass scattering expressed in terms of grey level as a function of the power supply voltage of the**  
222 **laser diode.** For each subject, the fitted straight line and the coefficient of determination are shown.

223

224 Table 2 presents the OTI values determined in each subject and the direct transmittance value computed from  
225 Eq 1.

226

227 **Table 2. Ocular transmission index and direct transmission of the eye for each subject of Group A.**

| Subject (iris color) | OTI     | Direct transmittance of the eye % |
|----------------------|---------|-----------------------------------|
| NF (dark)            | 0.00194 | 45.6                              |
| MPM (dark)           | 0.00151 | 40.3                              |
| OUP (dark)           | 0.00235 | 50.2                              |
| GLC (dark)           | 0.00183 | 44.3                              |
| DO (dark)            | 0.00128 | 37.1                              |
| FB (dark)            | 0.00169 | 42.6                              |
| APC (dark)           | 0.00173 | 43.1                              |
| LI (light)           | 0.00150 | 40.1                              |
| ES (light)           | 0.00178 | 43.7                              |
| DC (light)           | 0.00149 | 40.0                              |

228 Pigmentation (iris color) is shown in parentheses.

229 OTI, ocular transmission index.

230

231 The obtained values ranged from 37 % to 50 %, with a mean value of  $42.7 \pm 3.6$  % (Mean  $\pm$  SD) for the  
232 sample considered. The mean value for subjects with light eyes was  $41.3 \pm 2.1$  % (Mean  $\pm$  SD), whereas for subjects  
233 with dark eyes the mean was  $43.3 \pm 4.1$  % (Mean  $\pm$  SD). There is no significant difference in the transmittance found  
234 for these groups (P-value = 0.335).

235 Fig 9 (a) shows the DPS values for the four conditions evaluated in one of the subjects of the Group B (CT  
236 without a filter, CT + ND 0.01, CT + ND 0.1, and CT + ND 0.3) and the performed fit. From the slopes of these lines,  
237 the transmittance of each condition (eye or eye plus ND filter) was estimated using Eq 1 (measured transmission). The

238 transmittance of each condition can be predicted (computed transmission) by multiplying the known transmittance of  
239 each filter (Table 1) by the transmittance measured in the eye without filters. All the subjects from Group B showed a  
240 similar pattern of results.

241  
242 **Fig 9. Measured transmission vs predicted transmission.** (a) DPS as a function of laser voltage obtained in the  
243 subject CT with different neutral filters and the condition without a filter. (b) Direct transmission measured in each  
244 filter along with the eye for the five volunteers vs the computed transmission. Error bars show the relative error with  
245 respect to the expected value.

246  
247 Fig 9 (b) shows the transmittance values measured in the five subjects with three filters, as a function of the  
248 computed transmittance. The high correlation showed in Fig 9 (b) was expected and adds consistency to our results.  
249 However, it can be seen that errors grow for low transmittances (relative errors become 15% for transmittances of 0.2).

250

## 251 Discussion

252 This is the first article proposing a methodology to measure the *in vivo* direct transmittance of the whole eye,  
253 that is, including the retina. Boettner reported 54 % for direct transmittance at 780 nm in eyes corresponding to a  
254 similar range of age to that used in our work [3]. This value corresponds to the transmission of pre-retinal media  
255 (cornea, aqueous humor, lens, and vitreous). Moreover, Boettner's work shows a measure of the transmittance of rhesus  
256 monkey retina, which is considered anatomically similar to that of the human eye, of 80 % for a wavelength of 800  
257 nm, which means a total transmittance of 43 %. Our results, based on double-pass measurements that take the image  
258 reflected in the inner layers of the retina, provide an estimate of the direct transmittance of the eye including retina of  
259 42.7 %. There is no significant difference between our result and those reported in previous works (P-value = 0.675).

260 As with other optical quality measurements derived from the double-pass method [26], our measurement of  
261 transmittance is affected by uncorrected low-order aberrations (defocus and astigmatism). In our measurements, the  
262 refractive errors of the subjects were corrected with the spherical equivalent by means of the Badal system, therefore,  
263 in some subjects, there could be some uncorrected astigmatism effect that adds error to the measure.

264           Between each capture, from the beginning of the experiment until the end a few minutes pass, therefore, eye  
265 movements were inevitable. This would cause the laser to strike a different area of the retina with a slightly different  
266 reflectance, however, those variations did not produce changes on the measured slope. In that sense, the behavior of  
267 the eye was similar to that presented by the artificial eye (Fig 6).

268           Ginis et al. [24] have reported differences in a small sample in the straylight measured in subjects with light  
269 eyes and dark eyes. Ginis's measurements show that diffuse light from the fundus contributes significantly to the total  
270 straylight for wavelengths longer than 600 nm, especially in the measurements made for small-angles of the PSF (30  
271 arc minutes). In our study, no significant differences were found between the transmittances measured in subjects with  
272 different pigmentation.

273           According to Fig 9, the technique described in this work can be used for a wide range, however, because low  
274 values of transmission have a significant error the method would not be suitable for this range. For this, the present  
275 characteristic of the sensor limits the scope of the proposed method due to the low energy levels that reach it in the  
276 evaluated region. However, since we are only interested in the energy reaching this area and not in the whole PSF,  
277 single-pixel sensors could be used instead of a CCD to increase the dynamic range and capture much lower levels.

278           The transmittance values found to correspond to the wavelength of 780 nm and it is possible to determine the  
279 transmittance for other wavelengths using the same method, considering the modification in the sensor previously  
280 mentioned. In addition, a double-pass system with a polychromatic source has been developed in recent years [27] and  
281 the spectral transmittance of the human eye could be also determined based on the same configuration and the  
282 procedure described here. The spectral transmittance can be useful for specific applications such as in the study of  
283 intrinsically photosensitive retinal ganglion cells using a five-primary photostimulator, where it is necessary to  
284 characterize the individual differences in pre-receptor filtering in each subject [28,29].

285

## 286 **Conclusion**

287           We have developed a procedure to determine the transmittance of the human eye *in vivo* for a wavelength of  
288 780 nm using the double-pass method, commonly used for the determination of the optical quality of an eye. The  
289 process requires taking double-pass images with different laser beam intensities and determining the slope of the

290 straight line fitted to the obtained data. From this value and using a calibration equation we describe here; the direct  
291 transmittance of the eye is obtained.

292

## 293 **Acknowledgments**

294 We thank Jose Barraza, Ph.D., UNT-CONICET for the assistance and for comments that greatly improved the  
295 manuscript.

296

## 297 **References**

- 298 1. Le Grand Y. Light, Colour and Vision. Second English edition, translated from the French by Hunt RWG, Walsh JWT, and Hunt FRW.  
299 Chapman and Hall, London, 1968.
- 300 2. Boettner EA, Wolter JR. Transmission of the ocular media. Invest Ophthalmol Vis Sci. 1962 Dec;1(6):776-83.
- 301 3. Boettner EA. Spectral transmission of the eye. Final contract report AF41(609)-2966, University of Michigan, Ann Arbor MI, July 1967.  
302 [Available from NTIS as AD 663246].
- 303 4. Geeraets WJ, Berry ER. Ocular spectral characteristics as related to hazards from lasers and other light sources. Am J Ophthalmol. 1968  
304 Jul;66(1):15-20.
- 305 5. Alpern M, Thompson S, Lee MS. Spectral transmittance of visible light by the living human eye. J Opt Soc Am. 1965 Jun;55(6):723-7.
- 306 6. Dillon J, Zheng L, Merriam JC, Gaillard ER. Transmission spectra of light to the mammalian retina. Photochem Photobiol. 2000  
307 Feb;71(2):225-9.
- 308 7. Norren DV, Vos JJ. Spectral transmission of the human ocular media. Vision Res. 1974 Nov;14(11):1237-44.
- 309 8. van de Kraats J, van Norren D. Optical density of the aging human ocular media in the visible and the UV. J Opt Soc Am A Opt Image Sci  
310 Vis. 2007 Jul;24(7):1842-57.
- 311 9. Lund DJ, Marshall J, Mellerio J, Okuno T, Schulmeister K, Sliney D, et al. A computerized approach to transmission and absorption  
312 characteristics of the human eye. In: CIE 203:2012. 2012, International Commission on Illumination.
- 313 10. Santamaría J, Artal P, Bescós J. Determination of the point spread function of human eyes using a hybrid optical-digital method. J Opt Soc  
314 Am A. 1987 Jun;4(6):1109-14.
- 315 11. Artal P, Marcos S, Navarro R, Williams DR. Odd aberrations and double-pass measurements of retinal image quality. J Opt Soc Am A Opt  
316 Image Sci Vis. 1995 Feb;12(2):195-201.
- 317 12. Guirao A, Lopez-Gil N, Artal P. Double-pass measurements of retinal image quality: a review of the theory, limitations, and results. In:  
318 Proceedings Vision Science and its Applications; 2000 Feb 11; Santa Fe, New Mexico United States. OSA Technical Digest (Optical  
319 Society of America, 2000), paper NW4.

- 320 13. López-Gil N, Artal P. Comparison of double-pass estimates of the retinal image quality obtained with green and near infrared light. *J Opt*  
321 *Soc Am A Opt Image Sci Vis.* 1997 May;14(5):961-71.
- 322 14. Ginis HS, Perez GM, Bueno JM, Pennos A, Artal P. Wavelength dependence of the ocular straylight. *Invest Ophthalmol Vis Sci.* 2013  
323 May;54(5):3702-8.
- 324 15. van den Berg TJ, Franssen L, Coppens JE. Straylight in the human eye: testing objectivity and optical character of the psychophysical  
325 measurement. *Ophthalmic Physiol Opt.* 2009 May;29(3):345-50.
- 326 16. van den Berg TJ. Analysis of intraocular straylight, especially in relation to age. *Optom Vis Sci.* 1995 Feb;72(2):52-9.
- 327 17. Franssen L, Taberero J, Coppens JE, van den Berg TJ. Pupil size and retinal straylight in the normal eye. *Invest Ophthalmol Vis Sci.* 2007  
328 May;48(5):2375-82.
- 329 18. van den Berg TJ, Franssen L, Kruijt B, Coppens JE. History of ocular straylight measurement: A review. *Z Med Phys.* 2013 Feb;23(1):6-20.
- 330 19. Artal P, Benito A, Pérez GM, Alcón E, de Casas A, Pujol J, et al. An objective scatter index based on double-pass retinal images of a point  
331 source to classify cataracts. *PLoS One.* 2011 Feb 4;6(2):e16823.
- 332 20. Vilaseca M, Romero MJ, Arjona M, Luque SO, Ondategui JC, Salvador A, Güell JL, et al. Grading nuclear, cortical and posterior  
333 subcapsular cataracts using an objective scatter index measured with a double-pass system. *Br J Ophthalmol.* 2012 Sep;96(9):1204-10.
- 334 21. Paz Filgueira C, Sánchez RF, Issolio LA, Colombo EM. Straylight and visual quality on early nuclear and posterior subcapsular cataracts.  
335 *Curr Eye Res.* 2016 Sep;41(9):1209-15.
- 336 22. Barrionuevo PA, Colombo EM, Vilaseca M, Pujol J, Issolio LA. Comparison between an objective and a psychophysical method for the  
337 evaluation of intraocular light scattering. *J Opt Soc Am A Opt Image Sci Vis.* 2012 Jul;29(7):1293-9.
- 338 23. de Wit GC, Franssen L, Coppens JE, van den Berg TJ. Simulating the straylight effects of cataracts. *J Cataract Refract Surg.* 2006  
339 Feb;32(2):294-300.
- 340 24. Charitaras D, Ginis H, Artal P. Spatial properties of fundus reflectance and red-green relative spectral sensitivity. *J Opt Soc Am A Opt*  
341 *Image Sci Vis.* 2015 Sep;32(9):1723-8.
- 342 25. Safety of Laser Products, IEC 60825-1 Standard (2007).
- 343 26. Martínez-Roda JA, Vilaseca M, Ondategui JC, Giner A, Burgos FJ, Cardona G, et al. Optical quality and intraocular scattering in a healthy  
344 young population. *Clin Exp Optom.* 2011 Mar;94(2):223-9.
- 345 27. Ginis H, Pérez GM, Bueno JM, Artal P. The wide-angle point spread function of the human eye reconstructed by a new optical method. *J*  
346 *Vis.* 2012 Mar;12(3):20, 1-10.
- 347 28. Cao D, Nicandro N, Barrionuevo PA. A five-primary photostimulator suitable for studying intrinsically photosensitive retinal ganglion cell  
348 functions in humans. *J Vis.* 2015 Jan;15(1):27, 1-13.
- 349 29. Barrionuevo PA, Cao D. Luminance and chromatic signals interact differently with melanopsin activation to control the pupil light response.  
350 *J Vis.* 2016 Sep;16(11):29, 1-17.

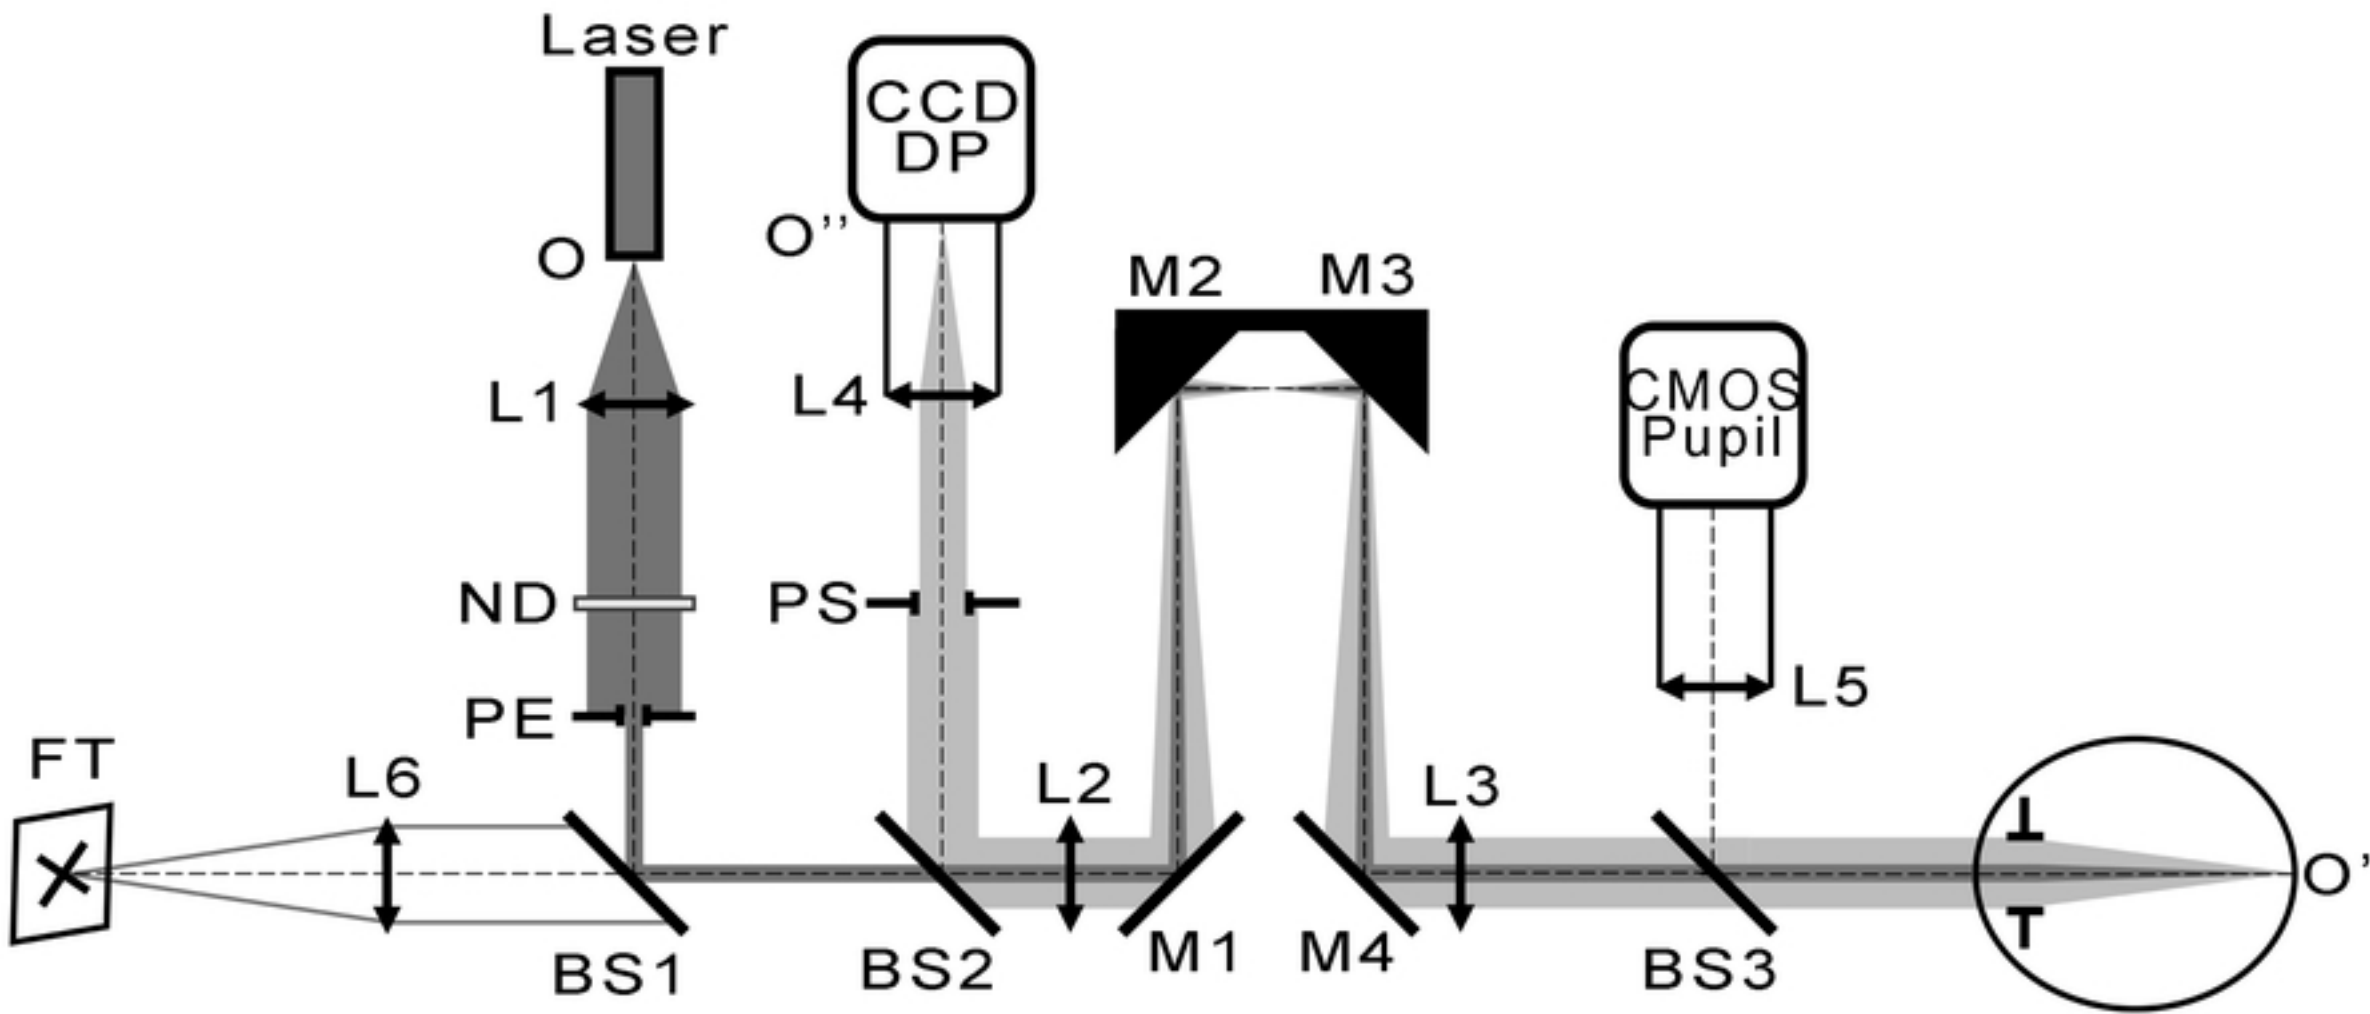

Fig 1

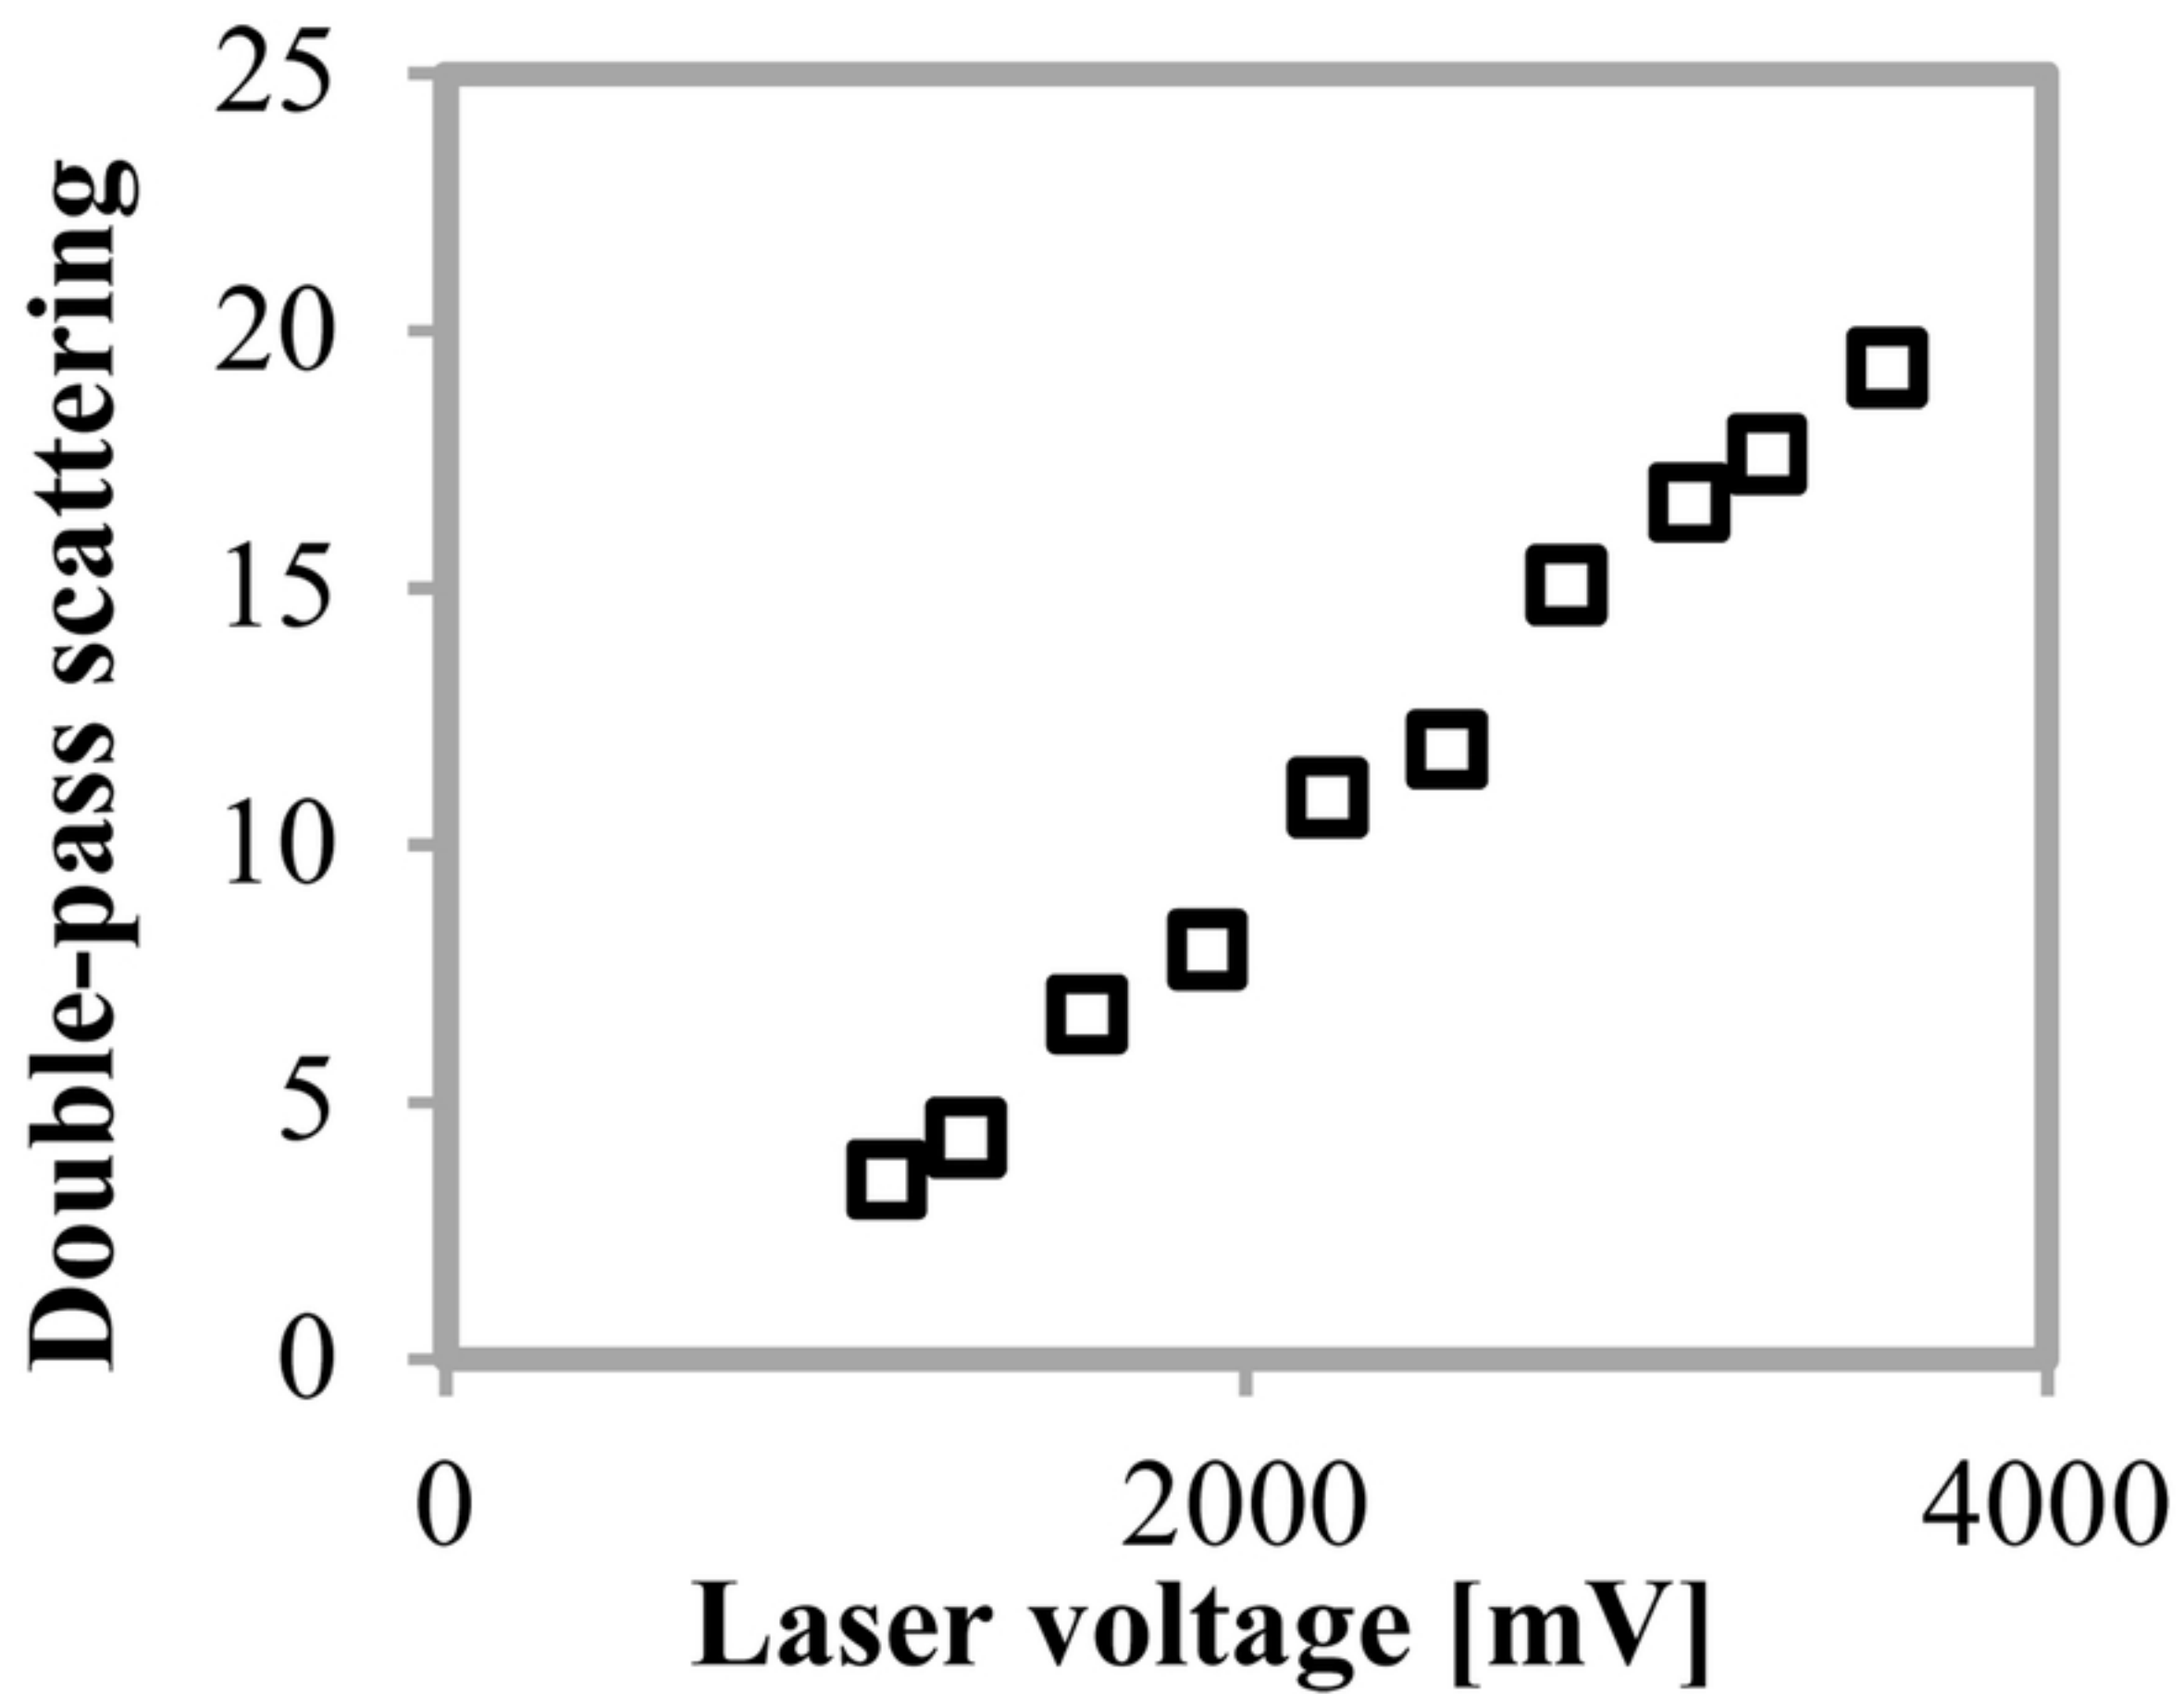

Fig 2

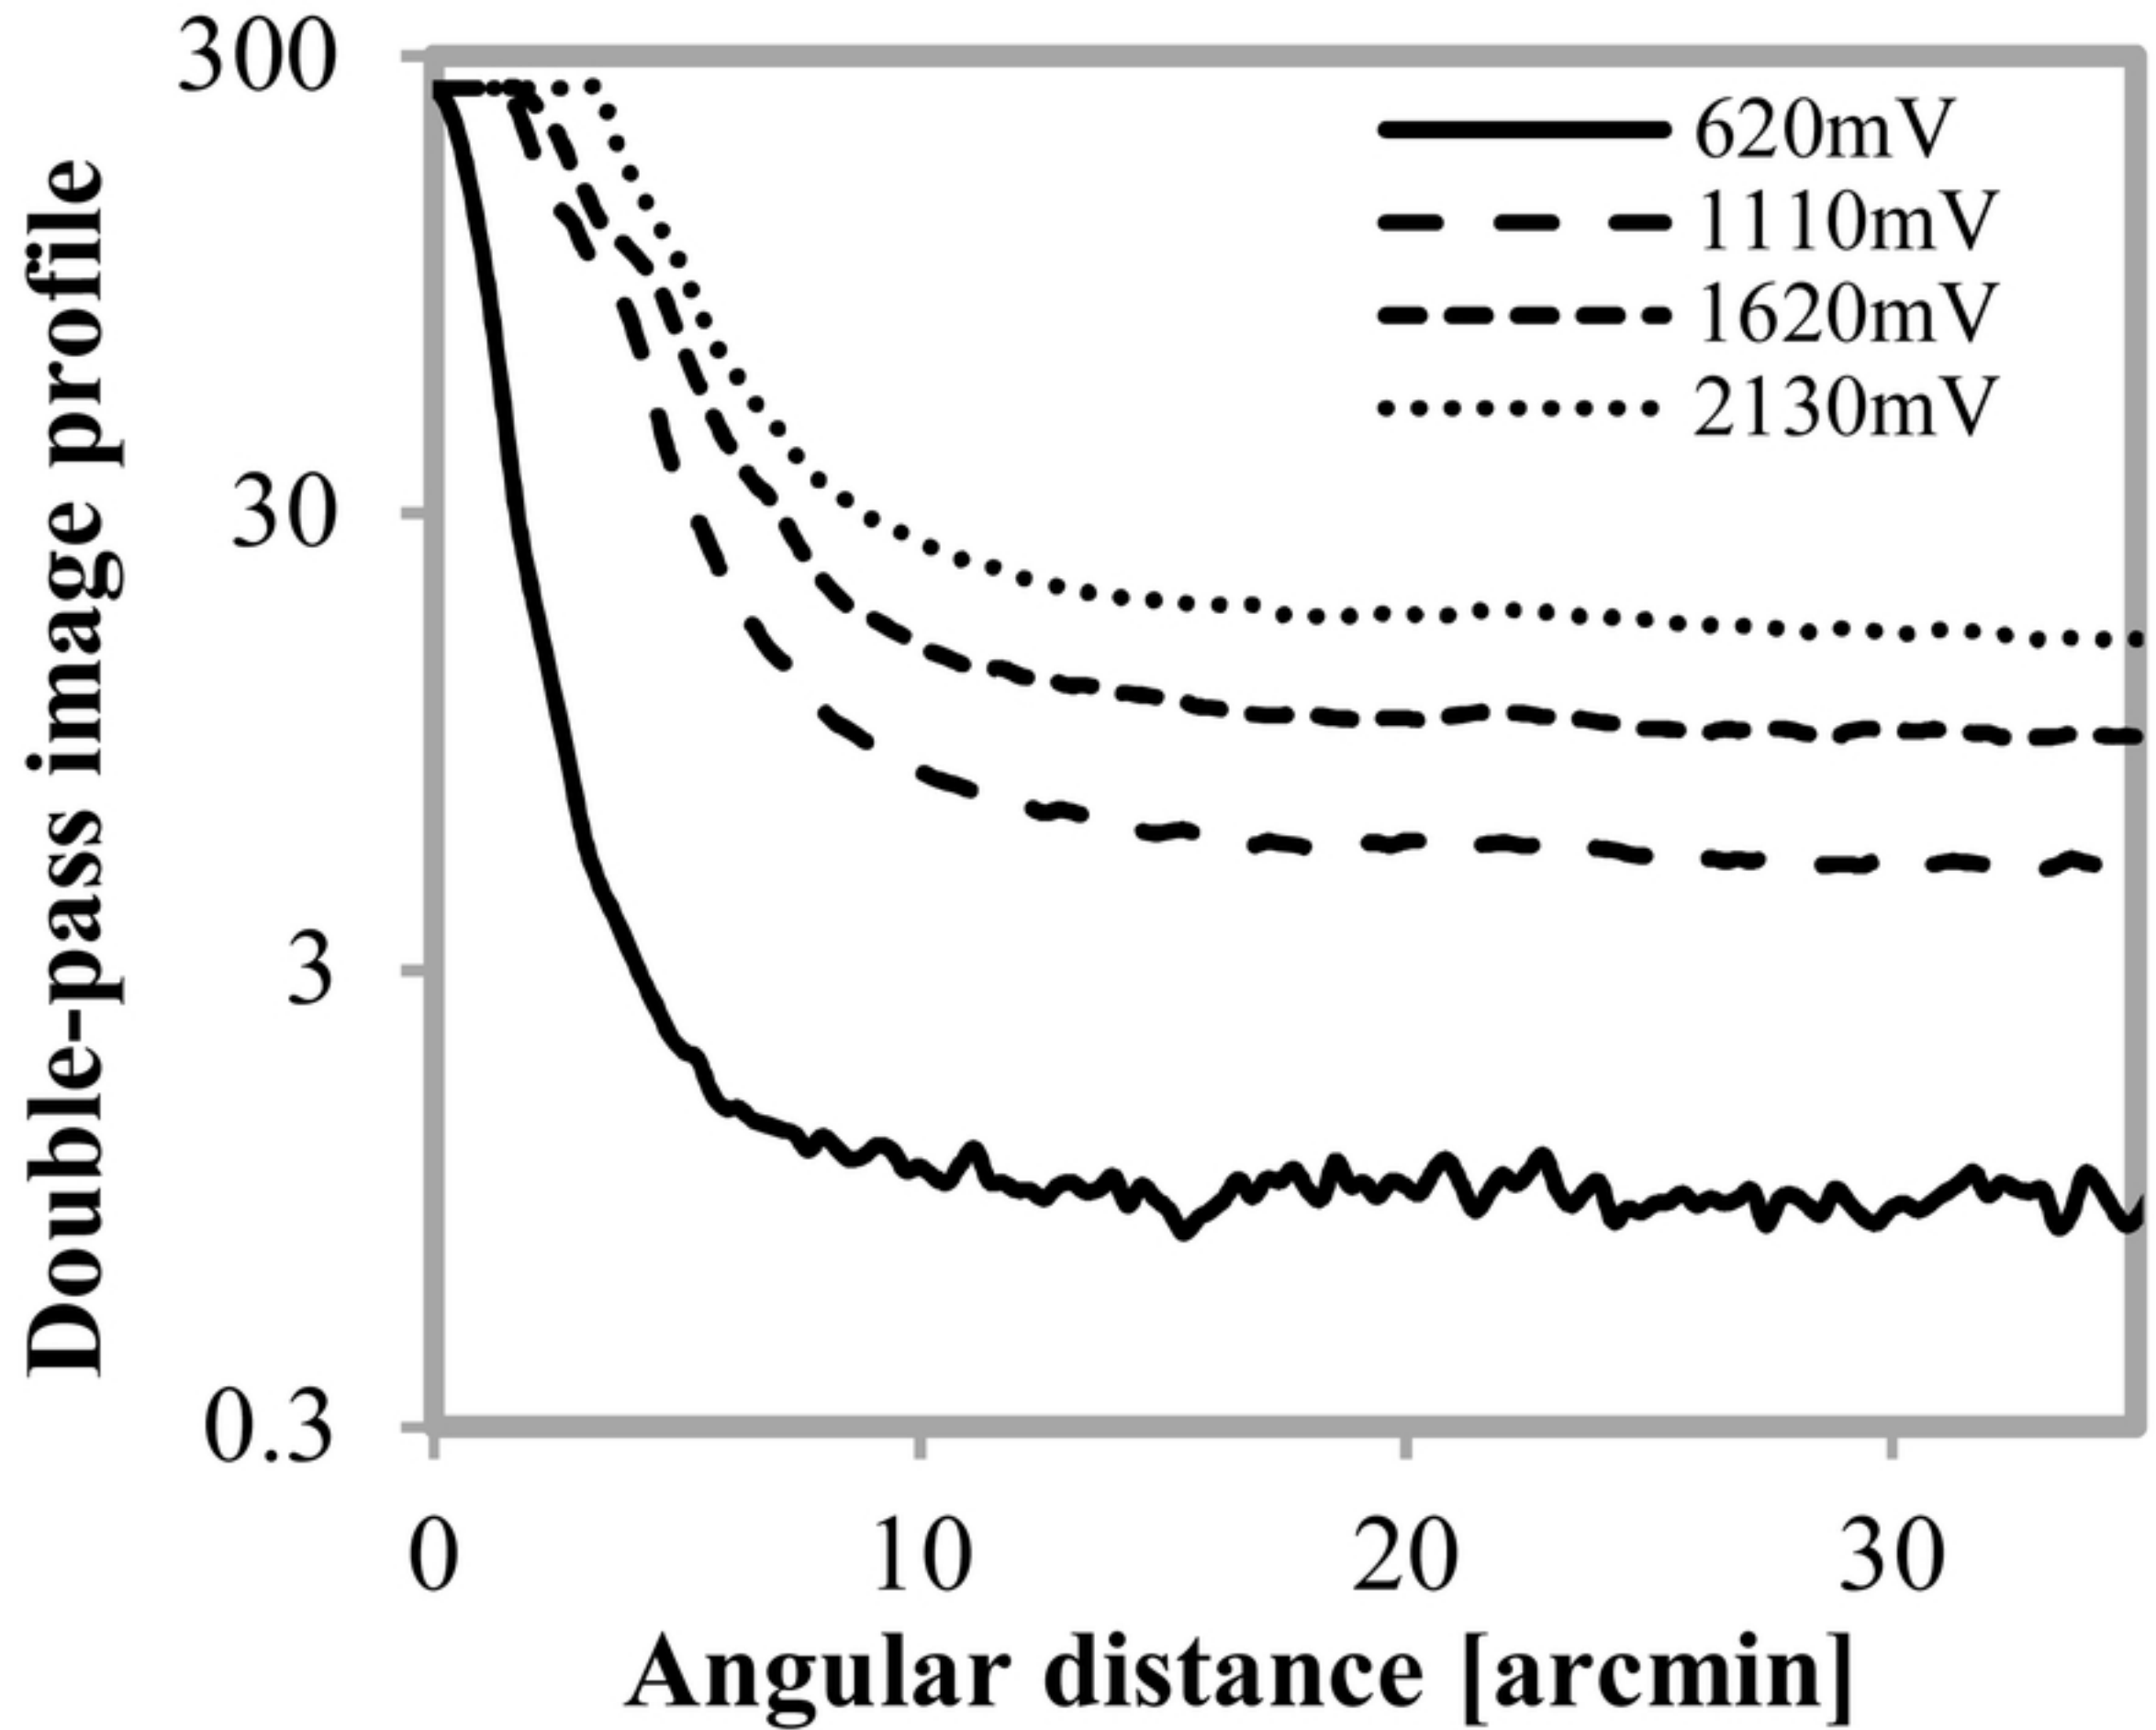

Fig 3



Double-pass scattering

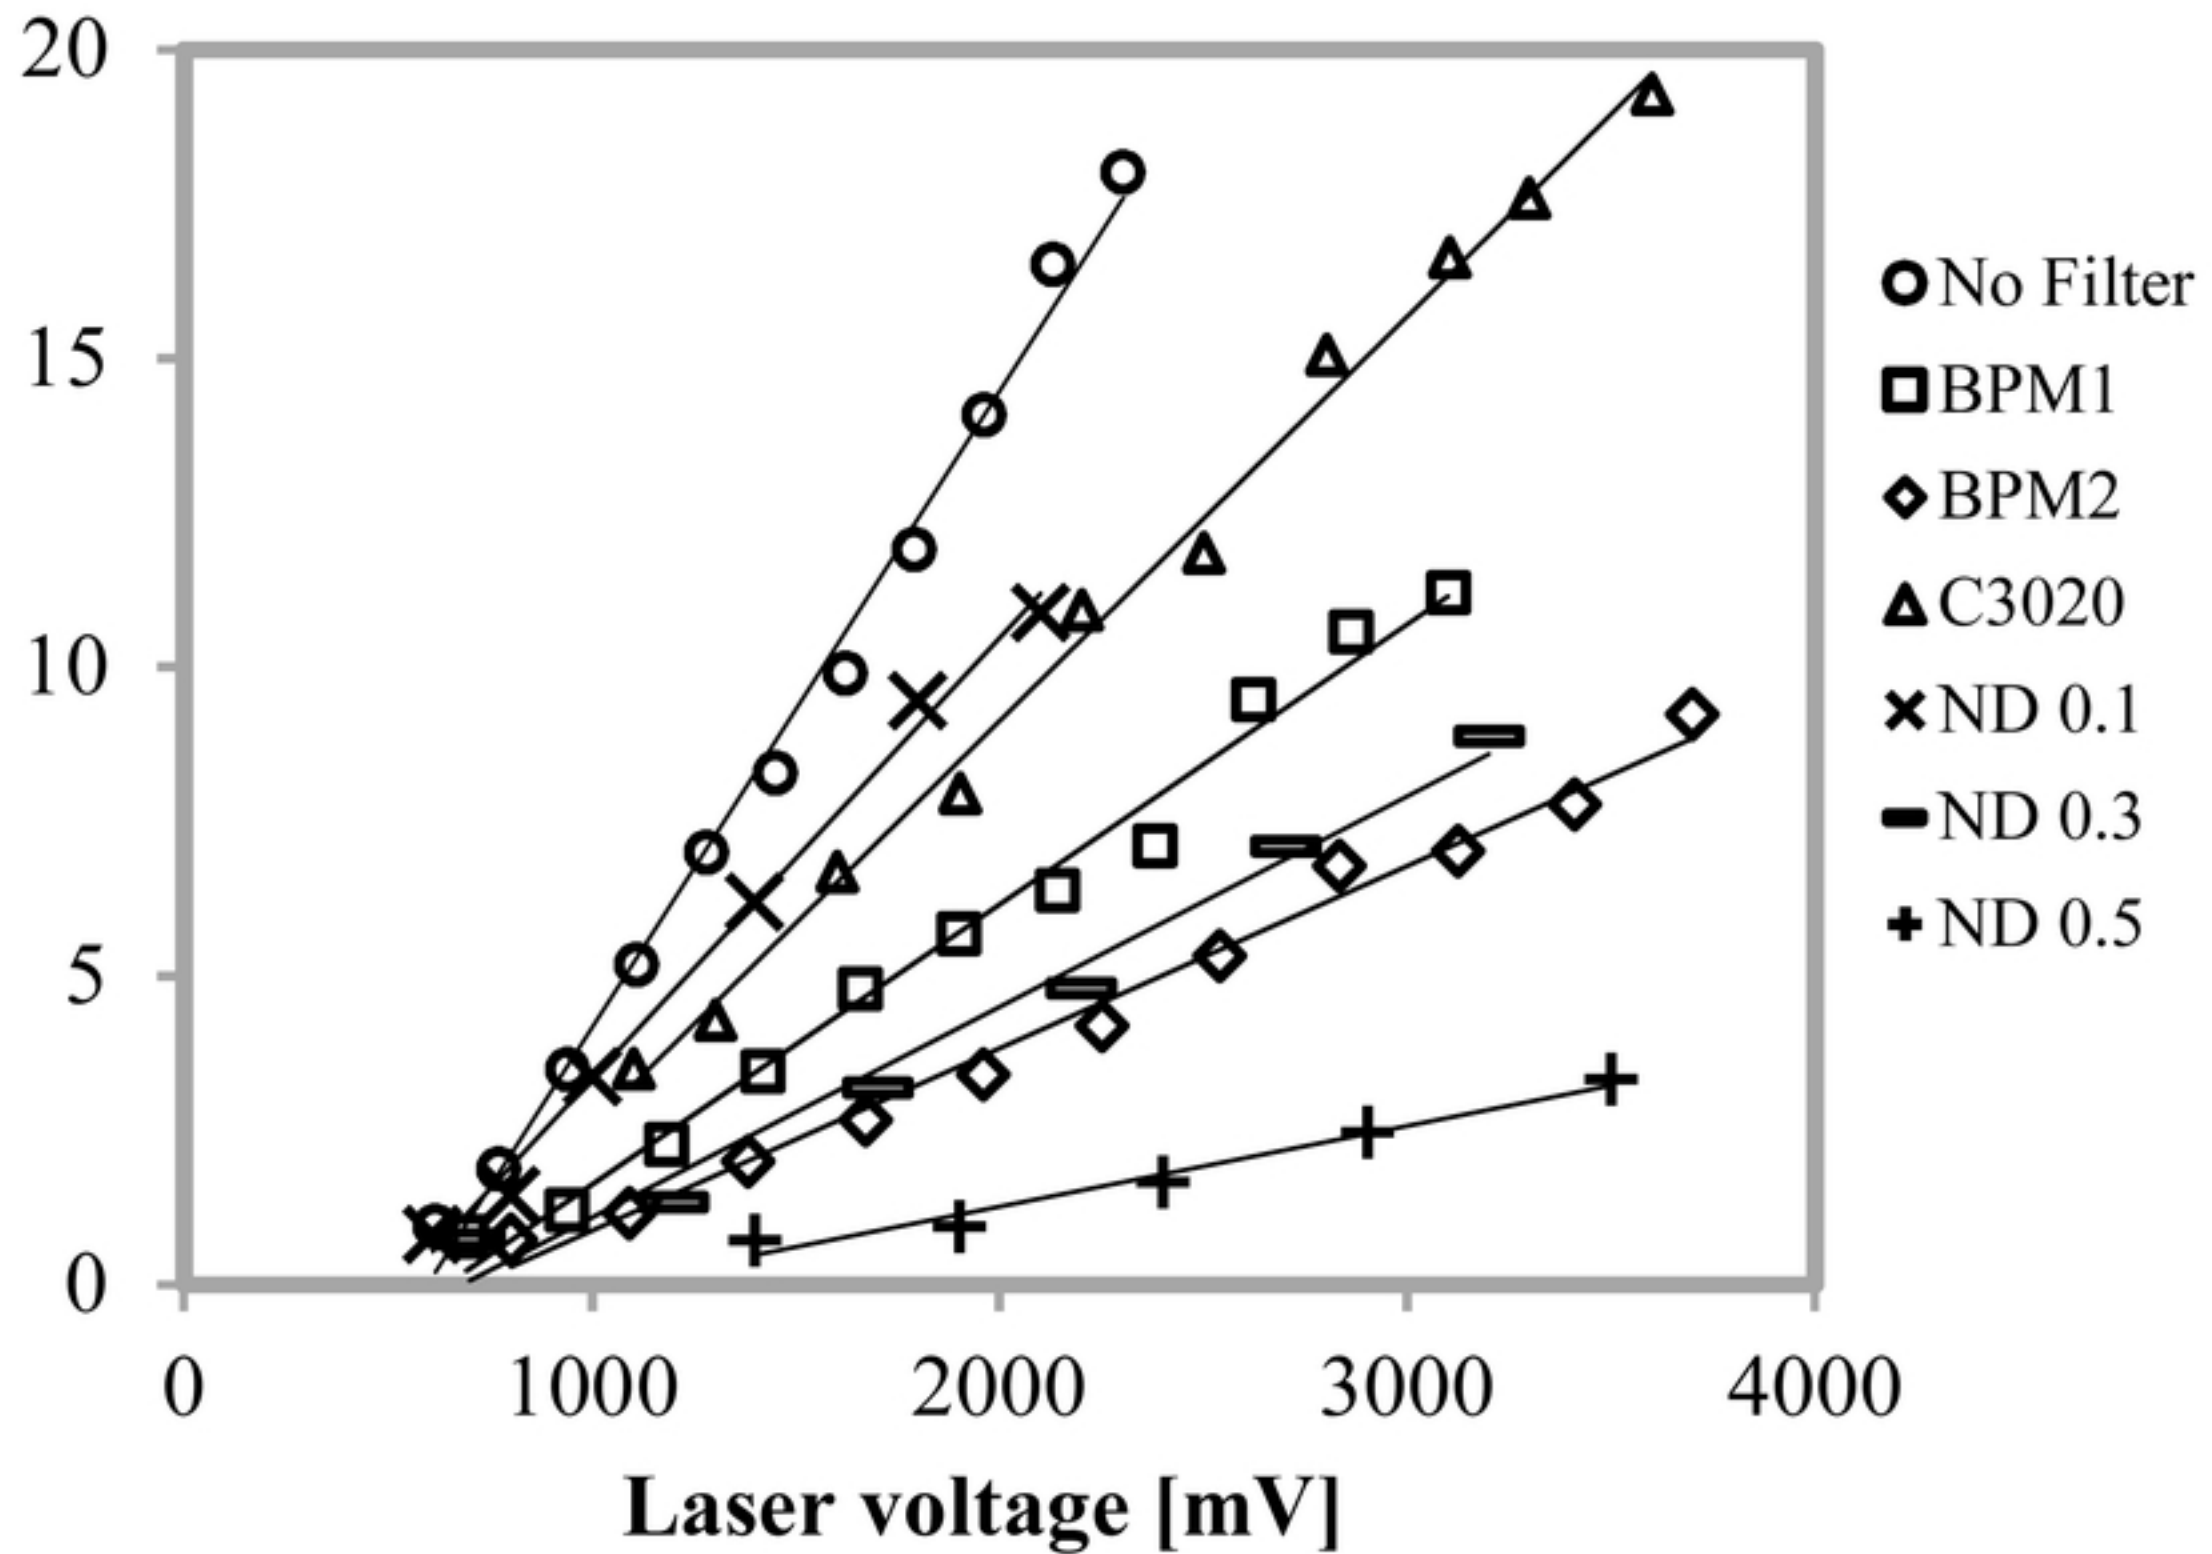

Fig 4

**Ocular transmission index**

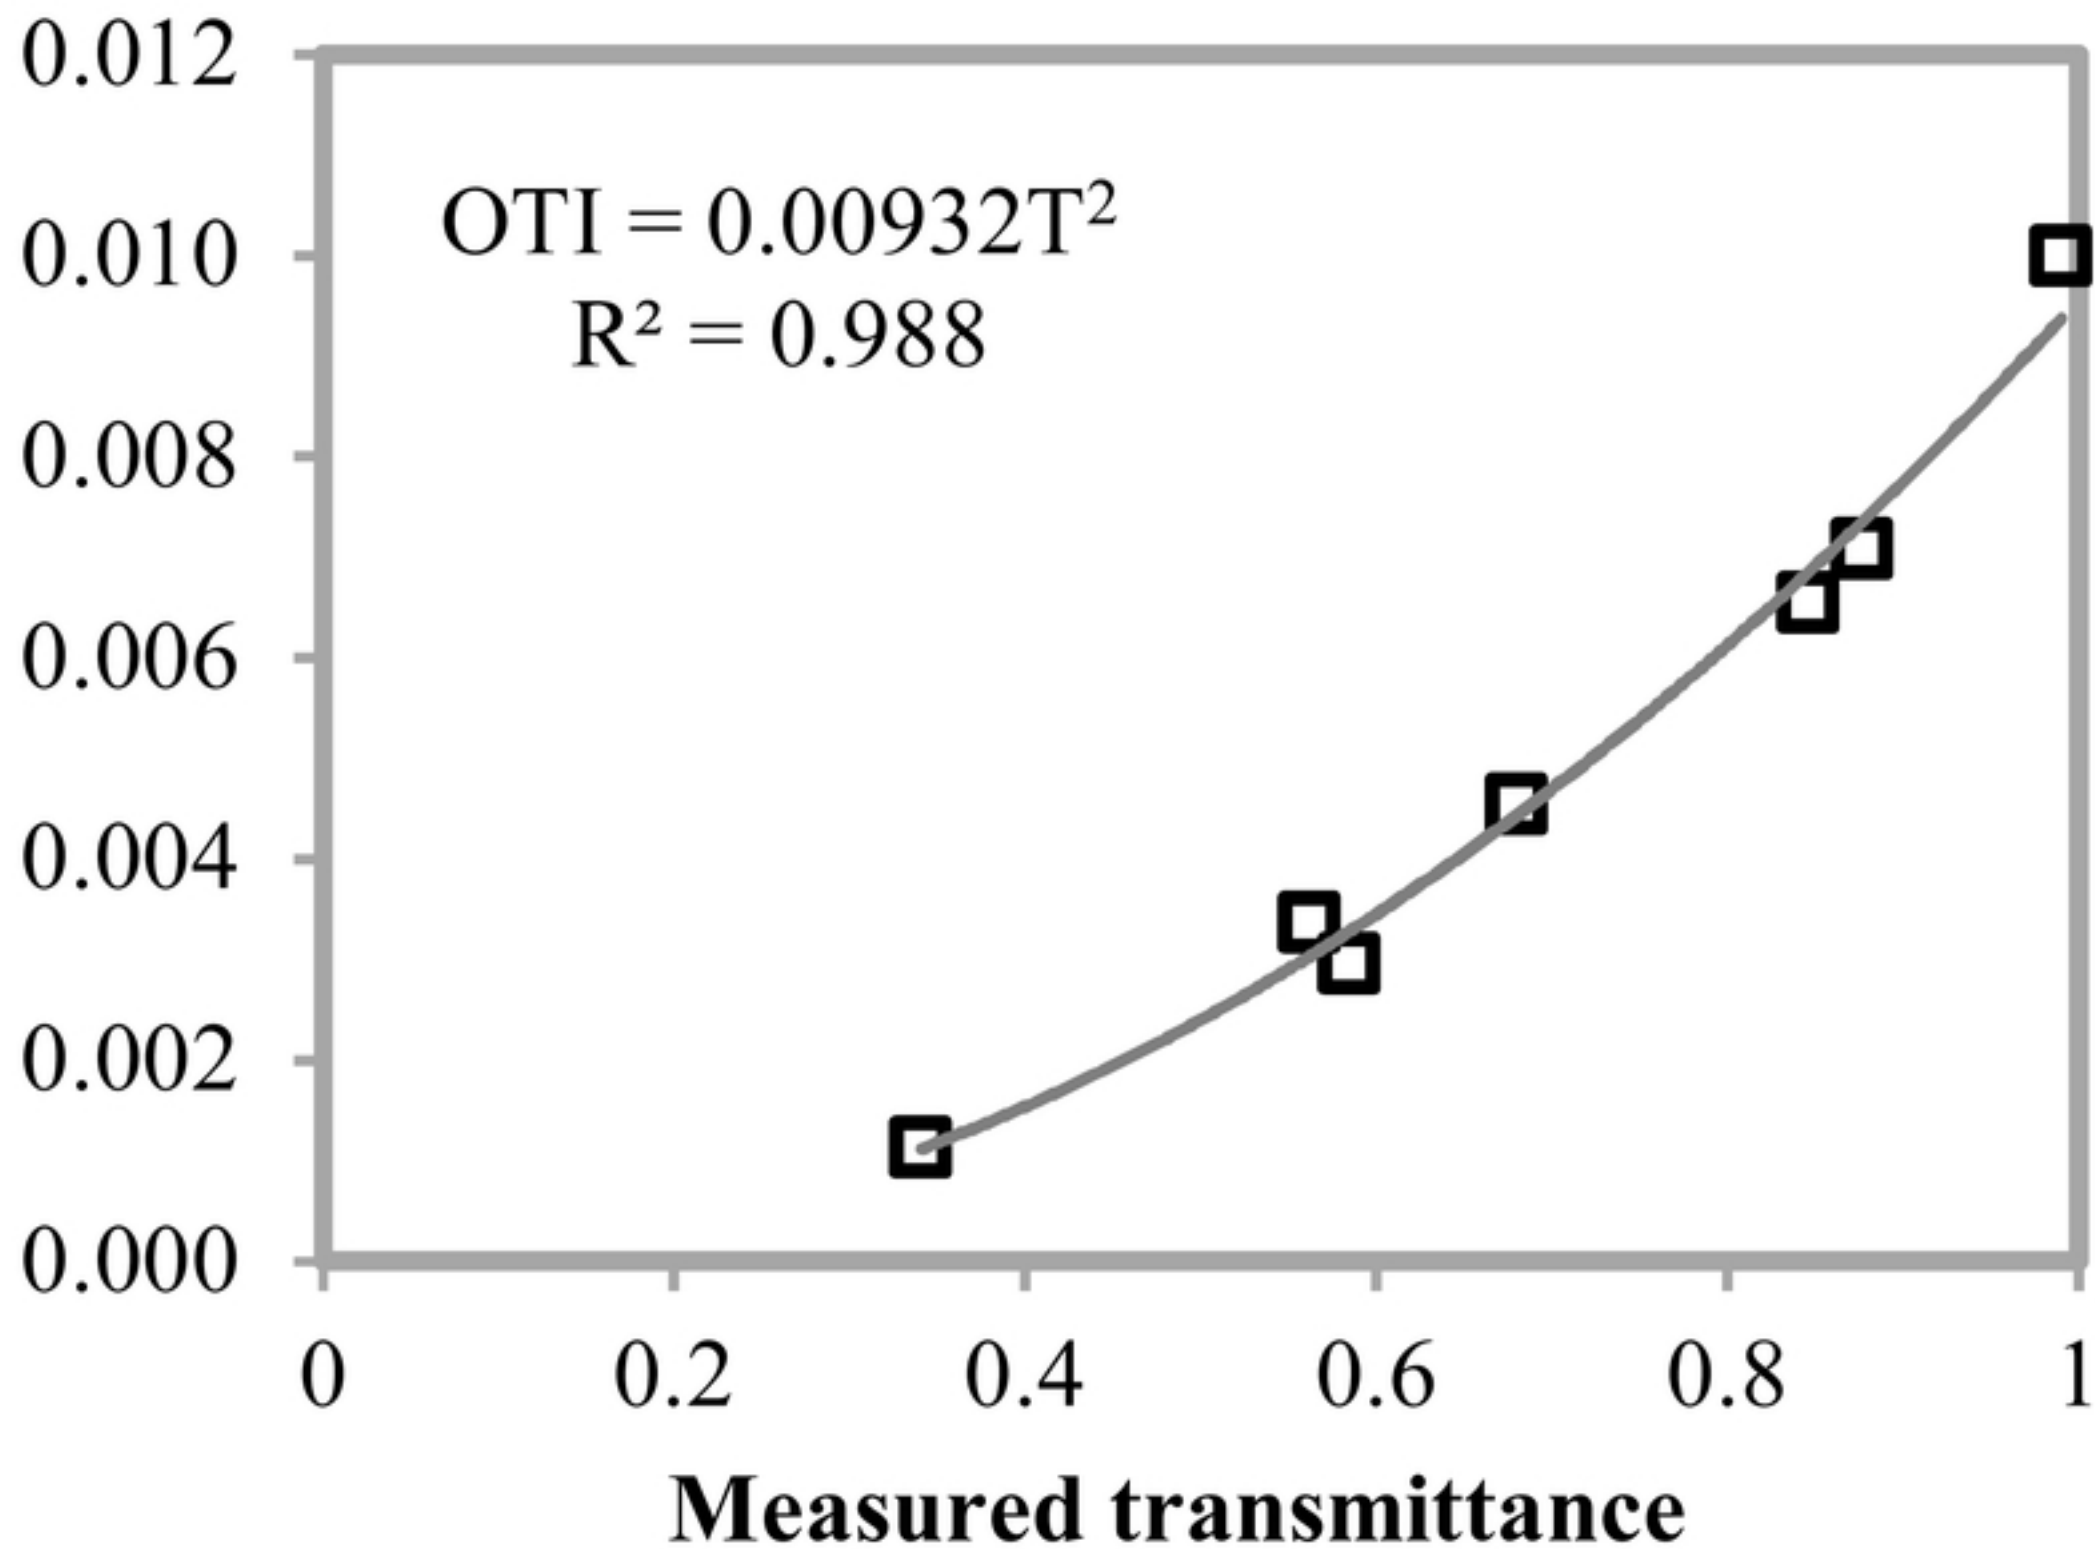

Fig 5

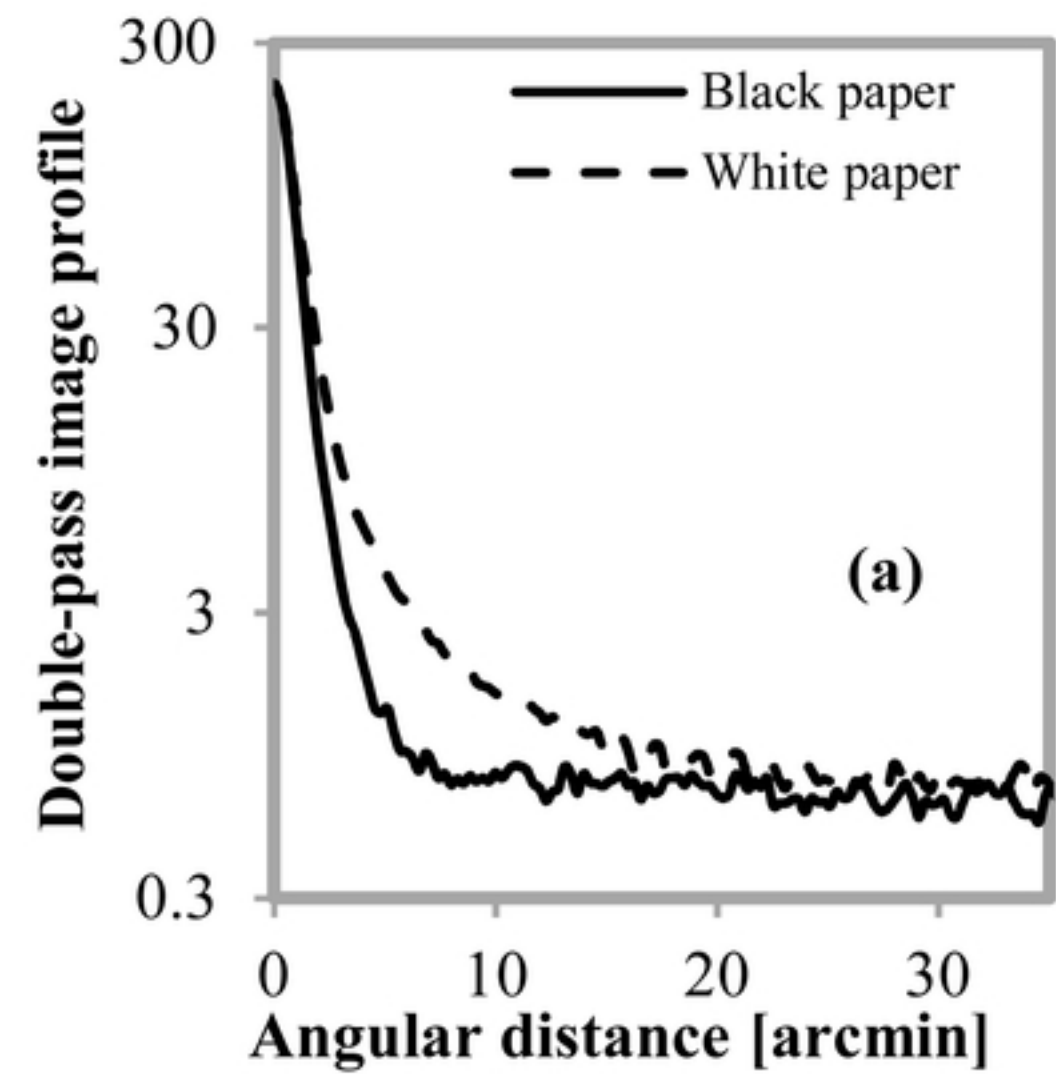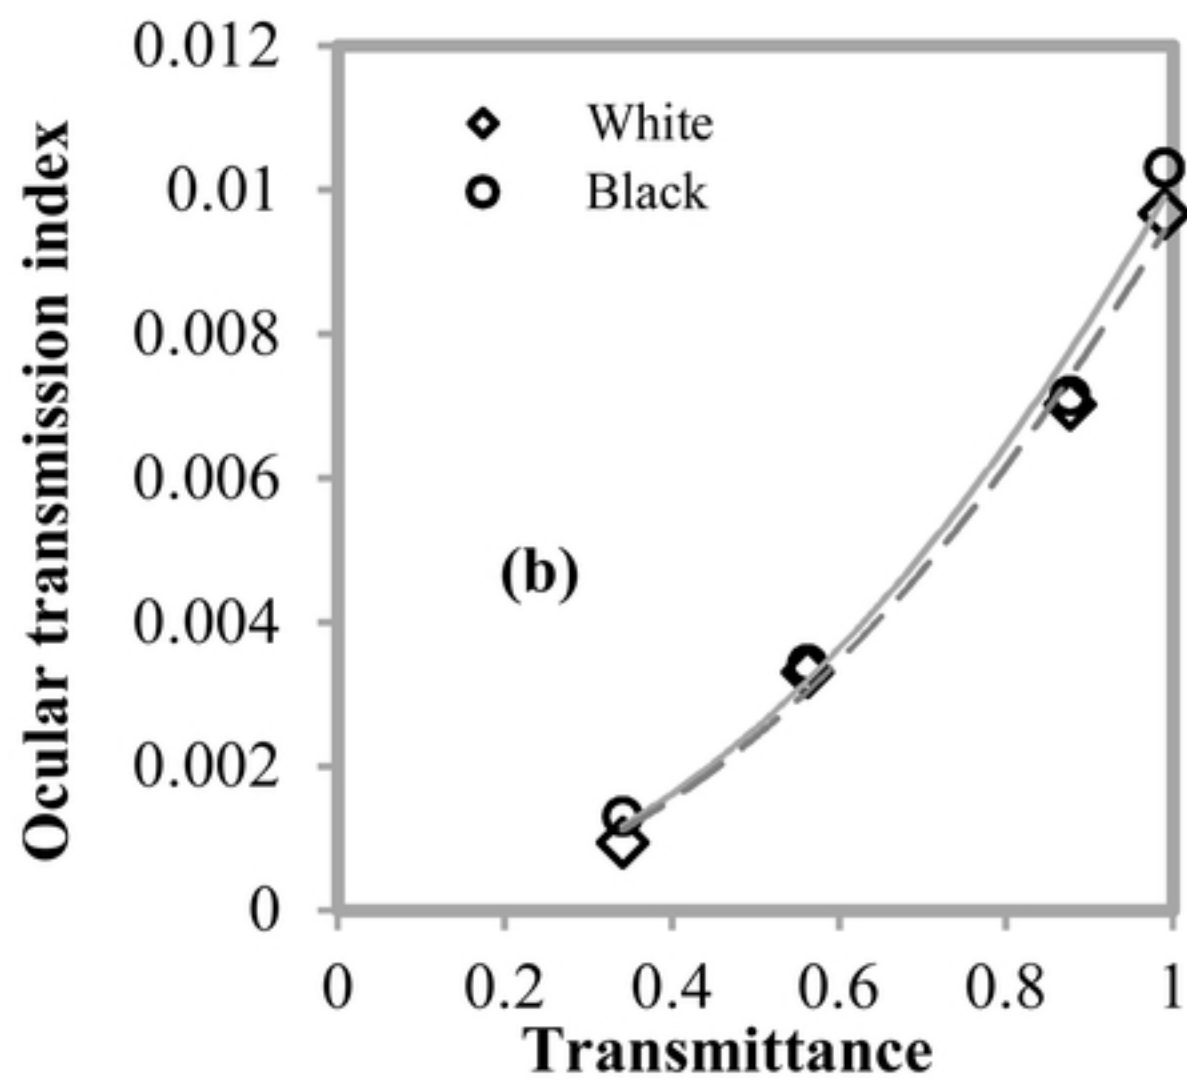

Fig 6

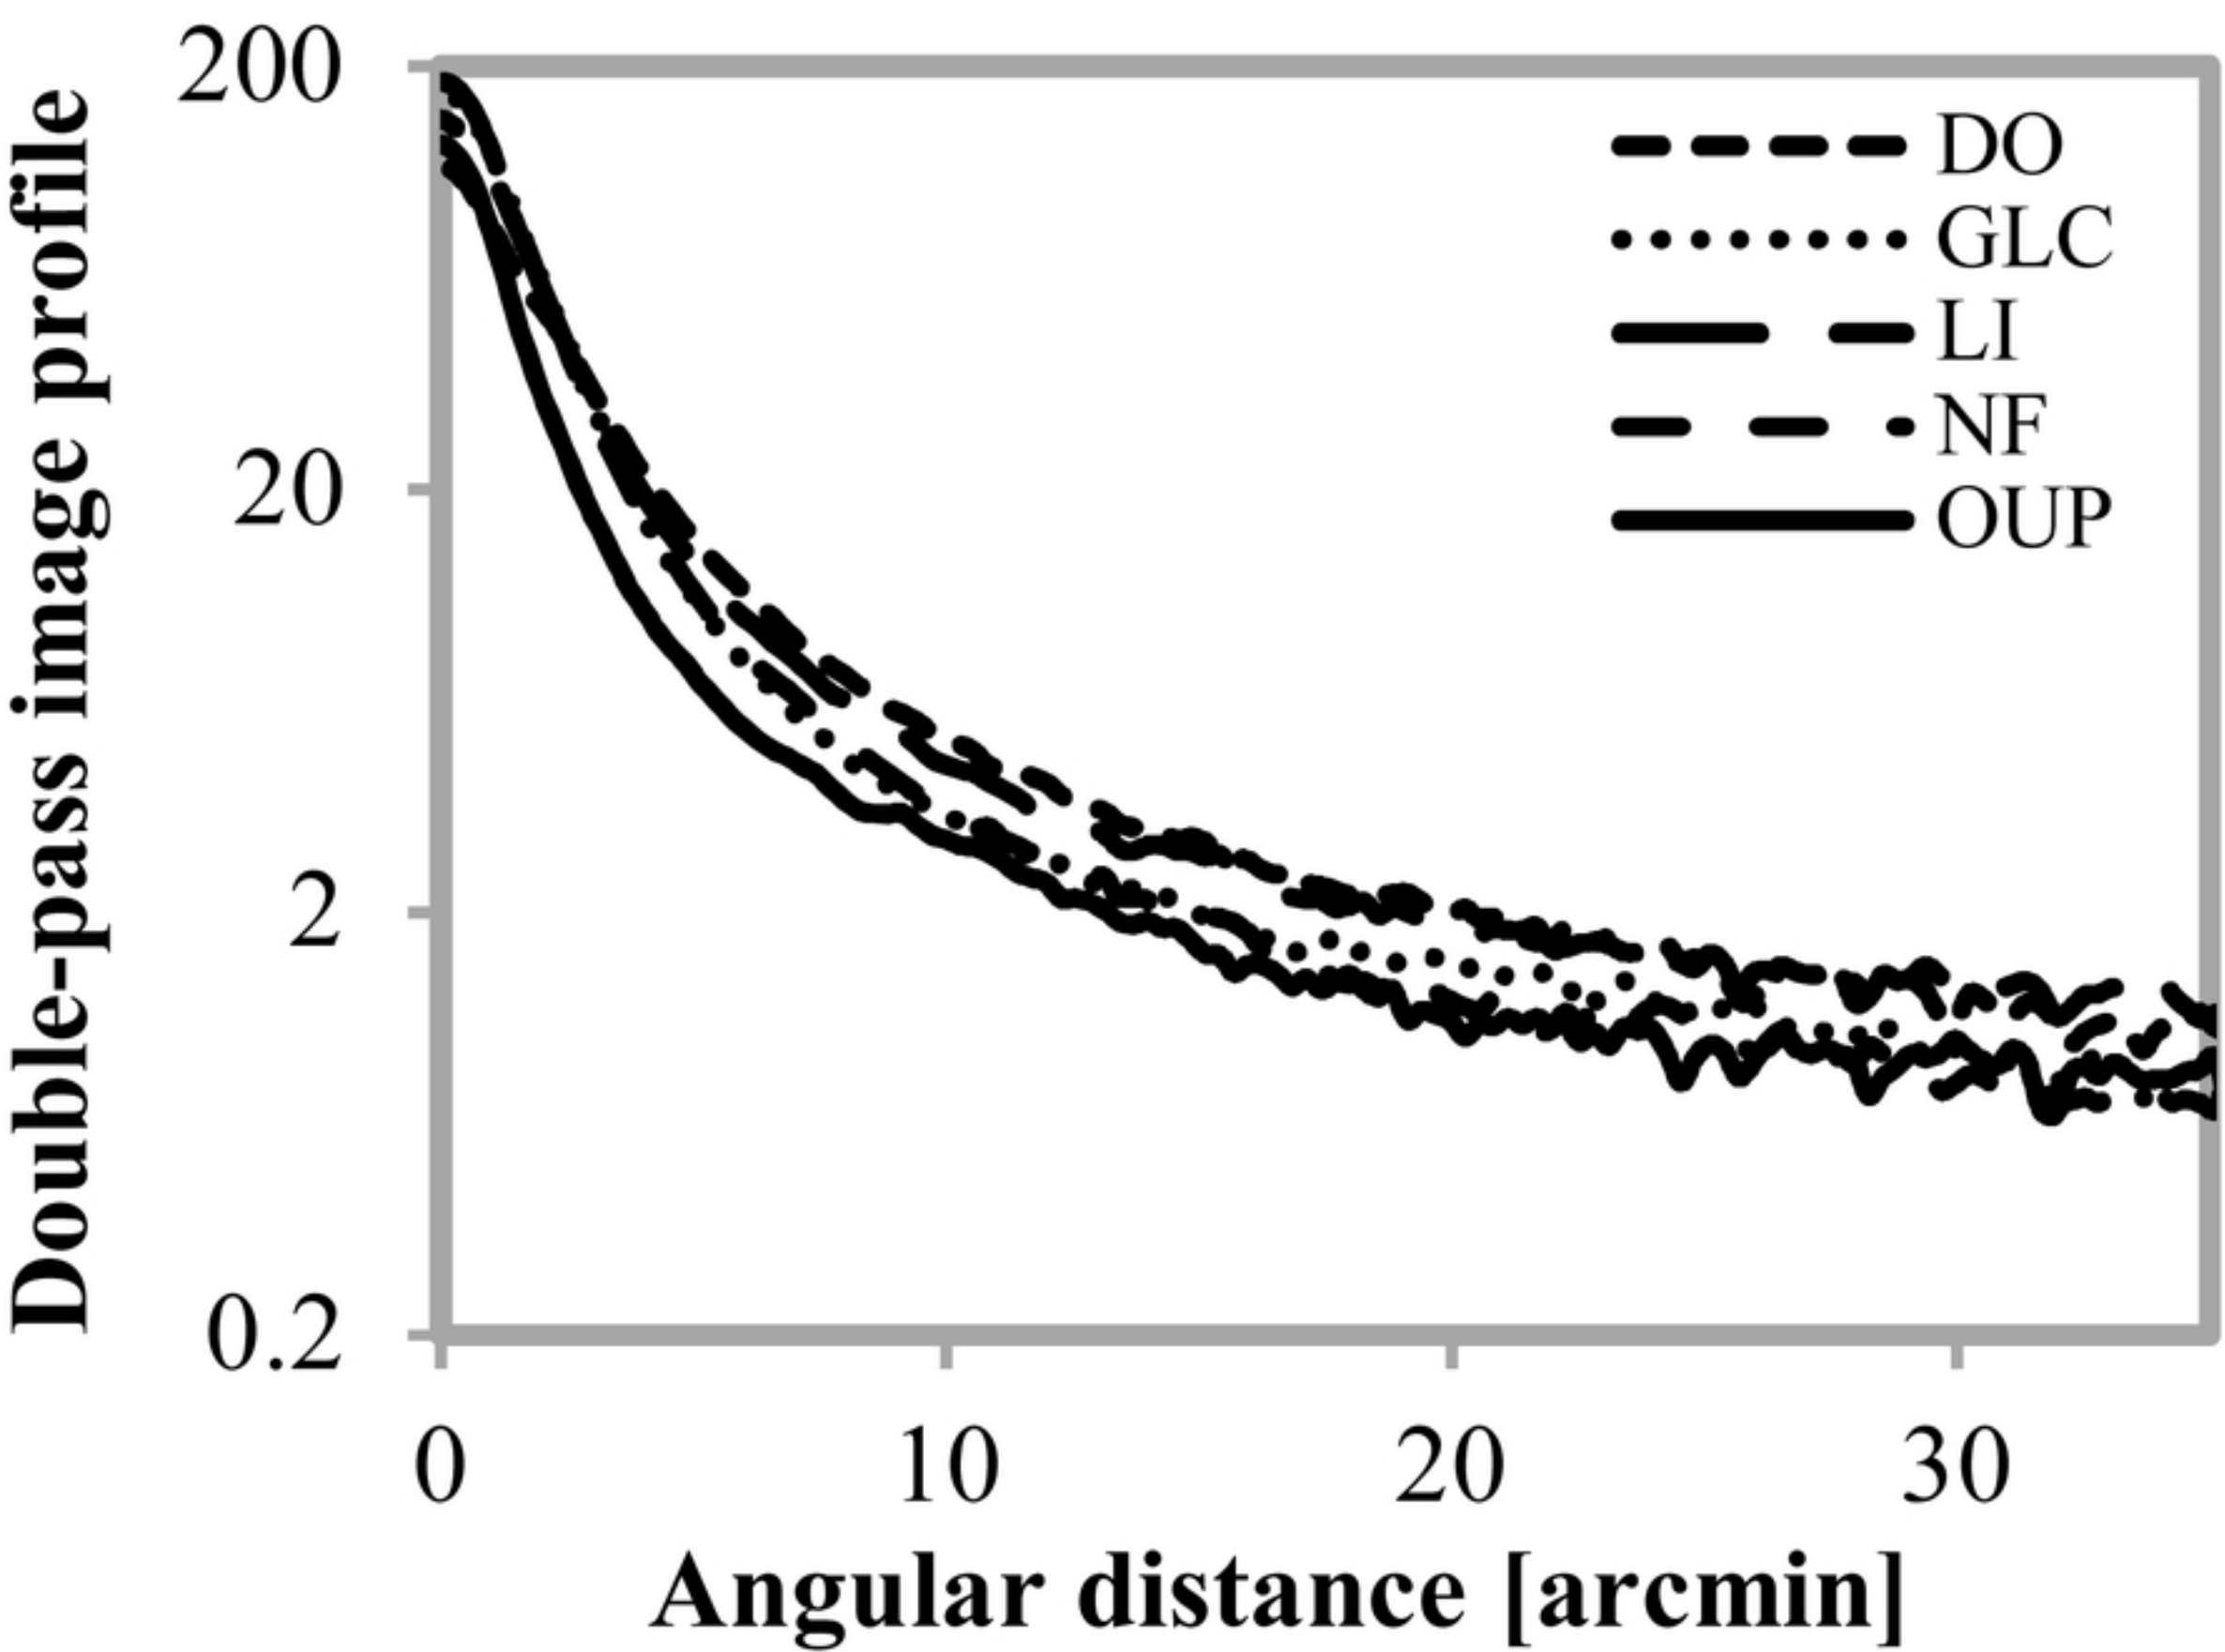

Fig 7

bioRxiv preprint doi: <https://doi.org/10.1101/606640>; this version posted April 11, 2019. The copyright holder for this preprint (which was not certified by peer review) is the author/funder, who has granted bioRxiv a license to display the preprint in perpetuity. It is made available under aCC-BY 4.0 International license.

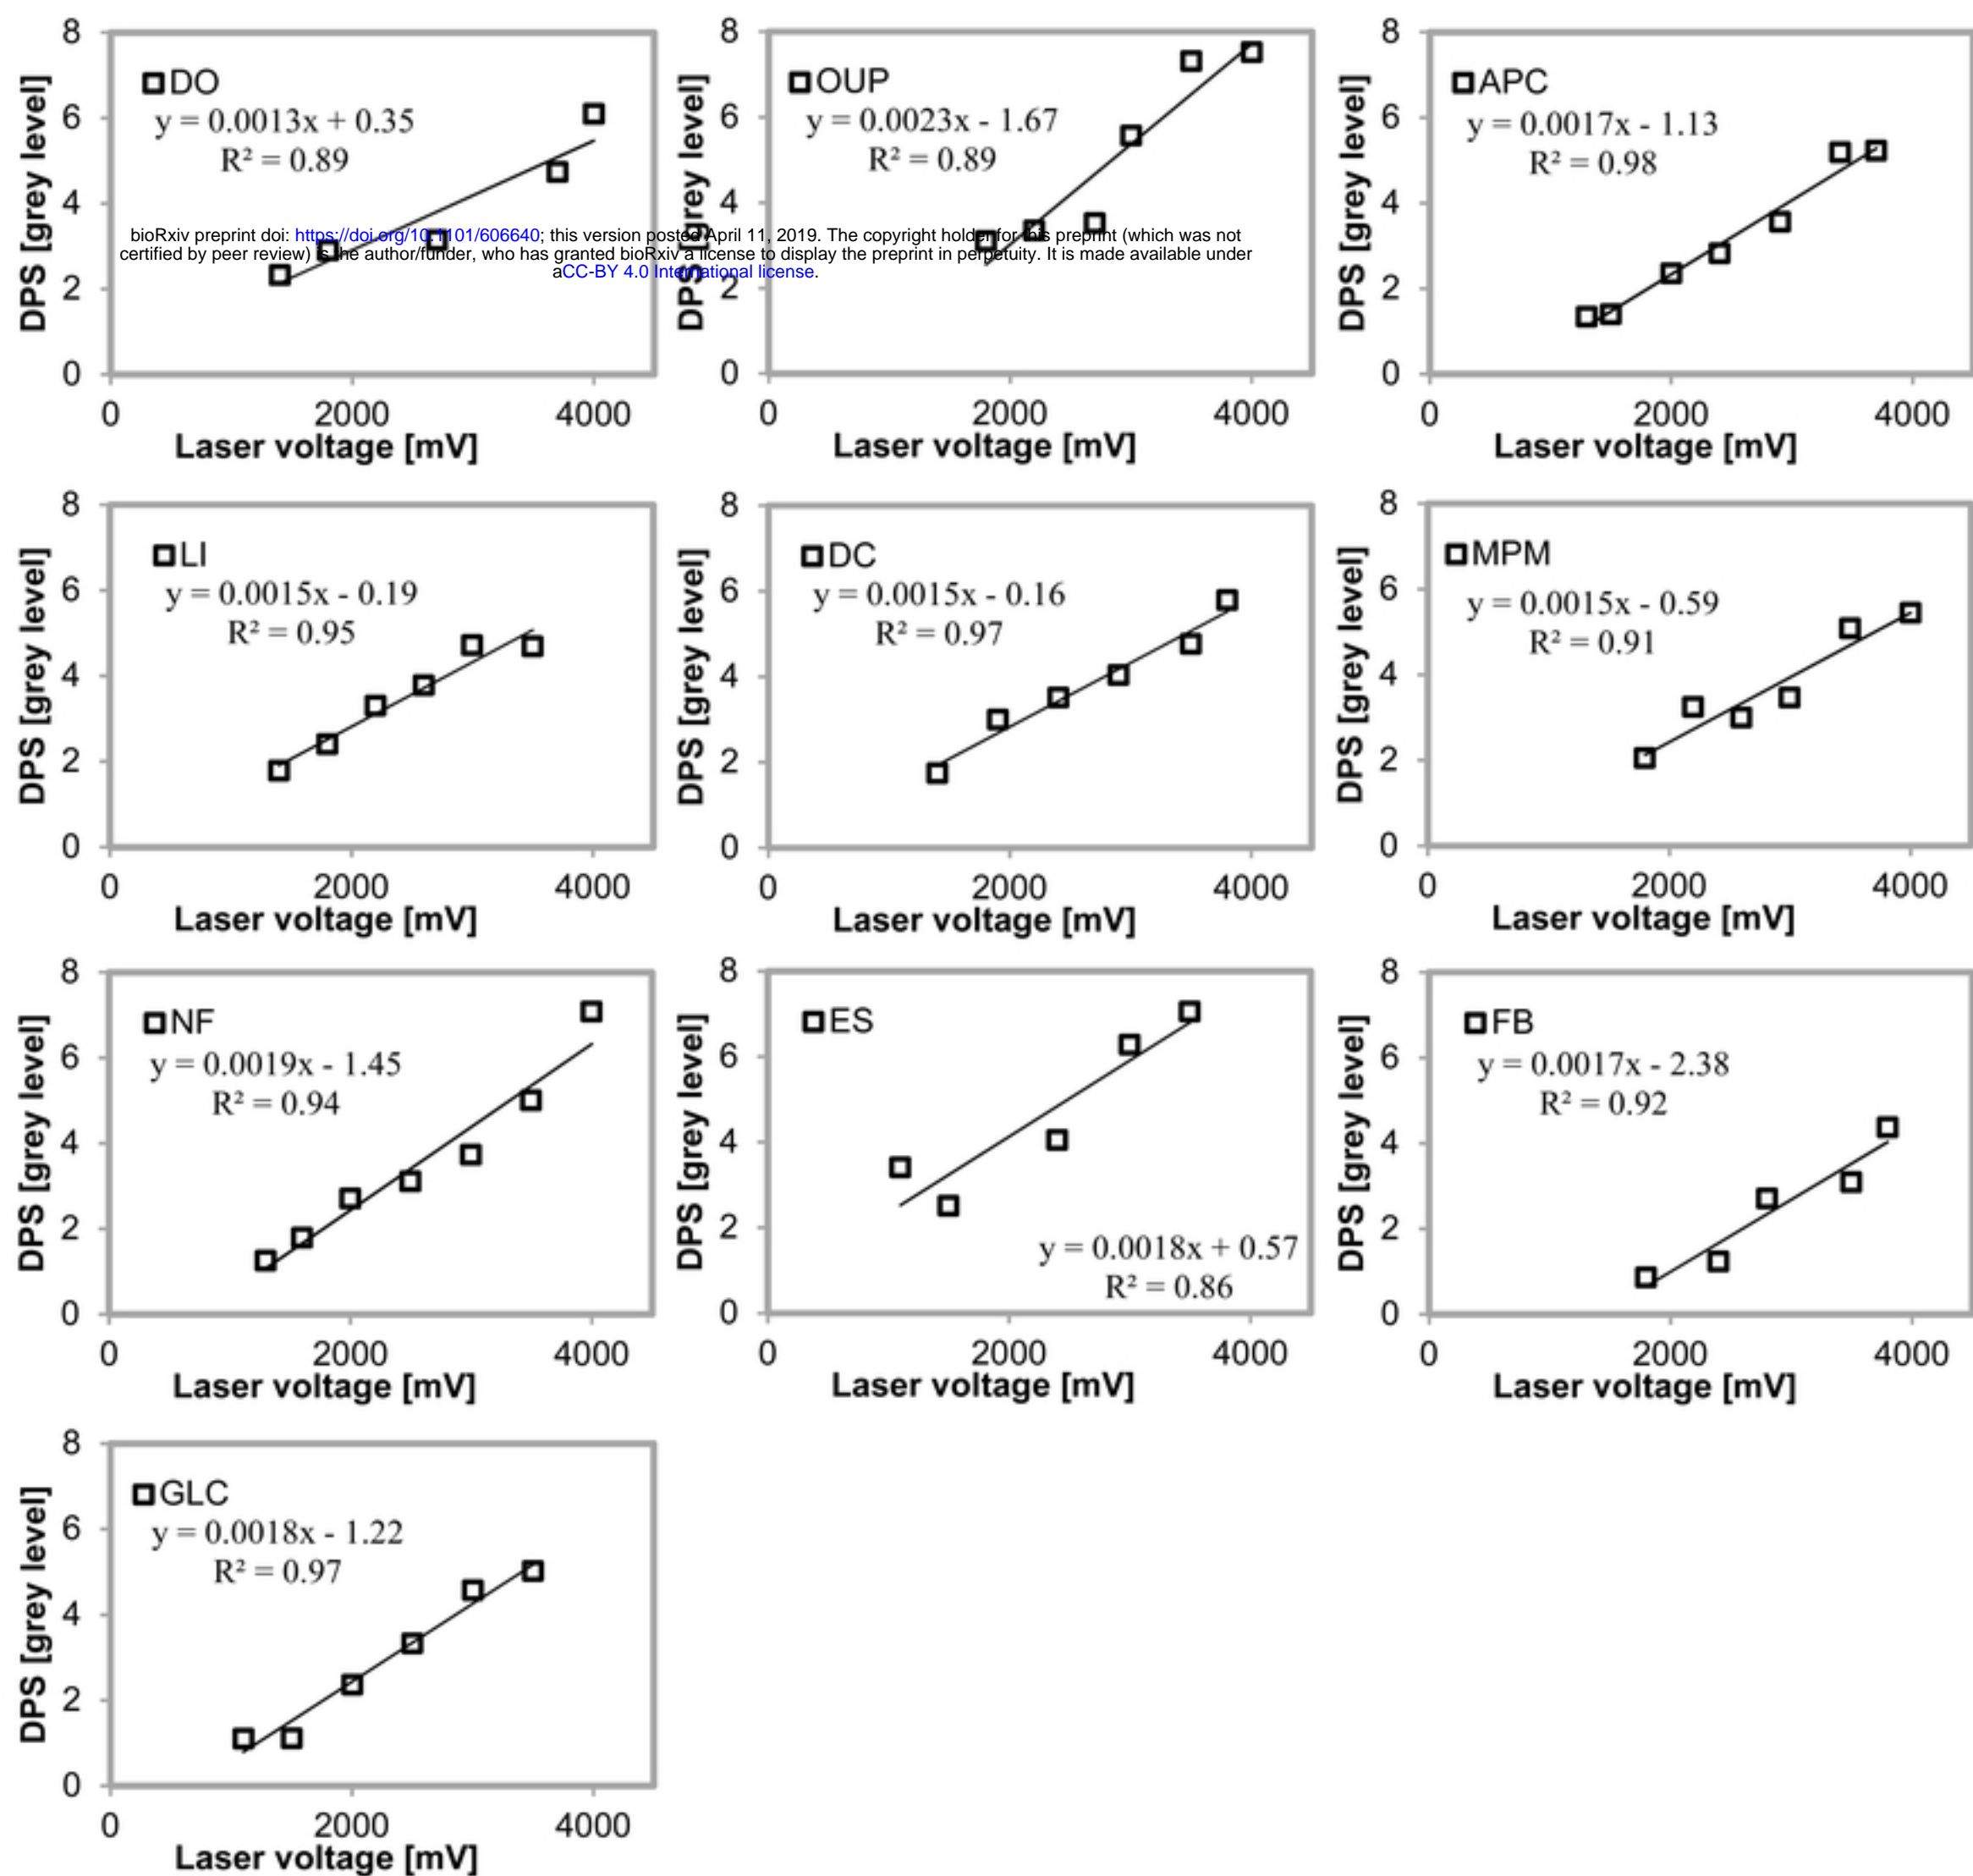

Fig 8

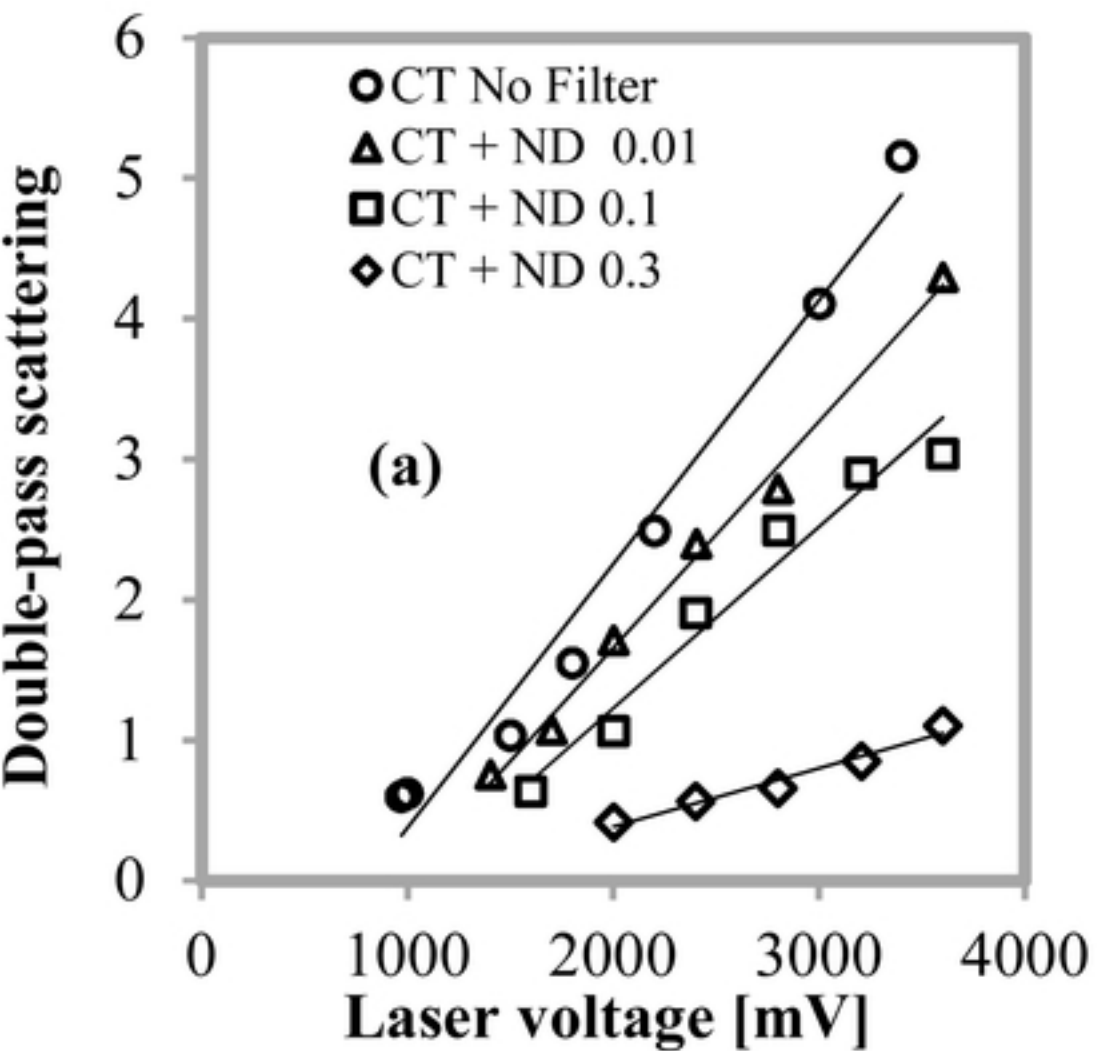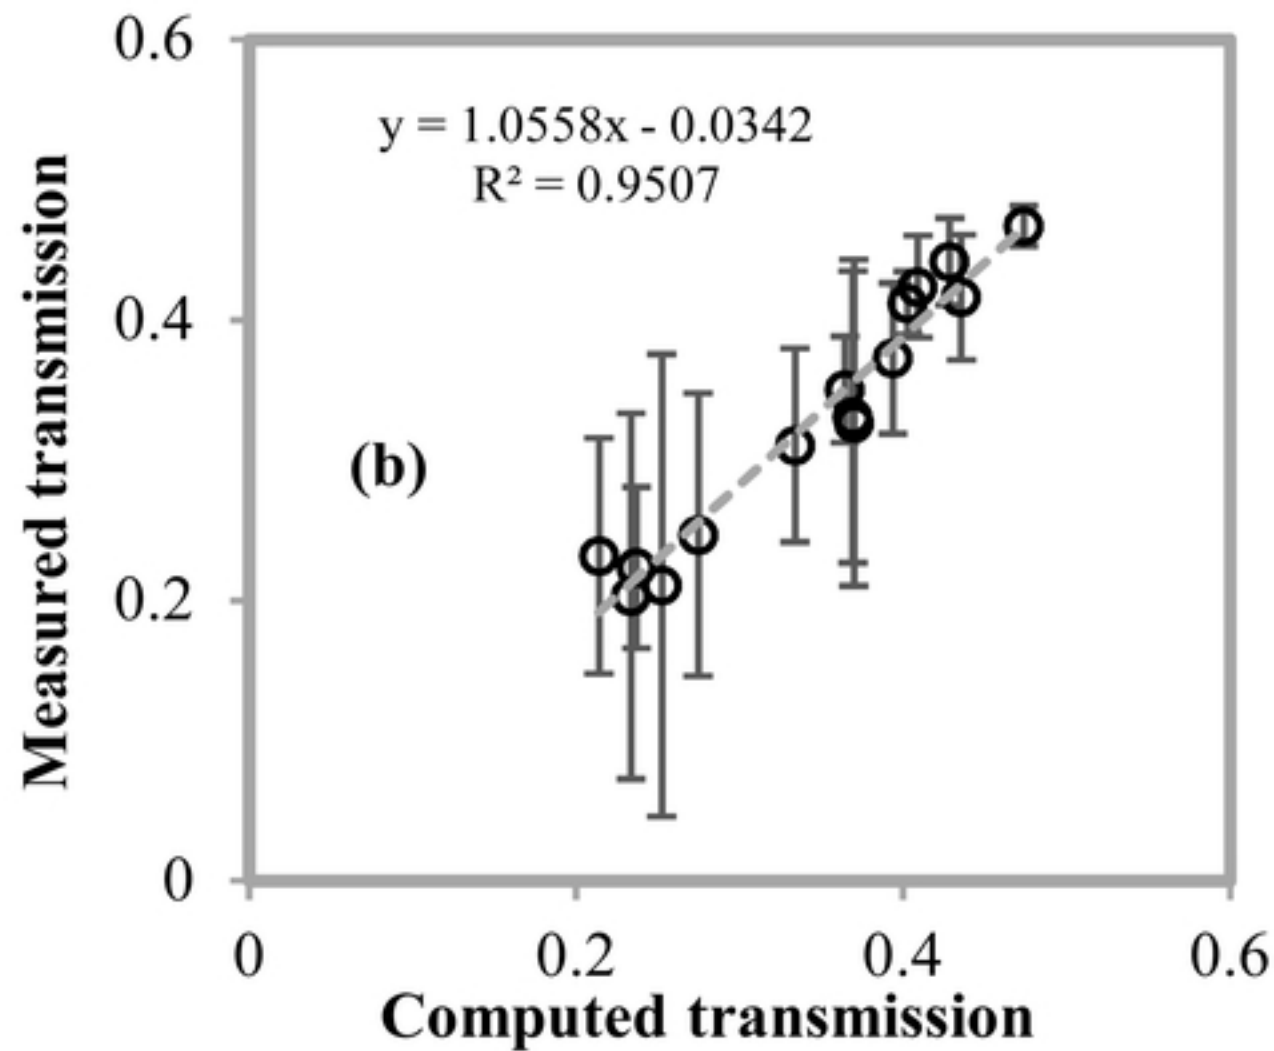

Fig 9
